# Supplementary material
Source: PubMed Central journal article supplement (PMC7855895)

**Supplementary Material 1: Search strategy and article screening flowchart**

| Item                  | Criteria                                                                                                                                      |
|-----------------------|-----------------------------------------------------------------------------------------------------------------------------------------------|
| Databases             | PubMed and SPORTDiscus                                                                                                                        |
| Dates                 | Updated until August 2019; no limit on publication date                                                                                       |
| Boolean search string | 1. (acceleromet* OR pedomet* OR device OR monitor OR wearable) AND ("steps/min*" OR "steps per min*" OR "step count") AND (valid* OR reliab*) |
| Filters               | Human; English                                                                                                                                |

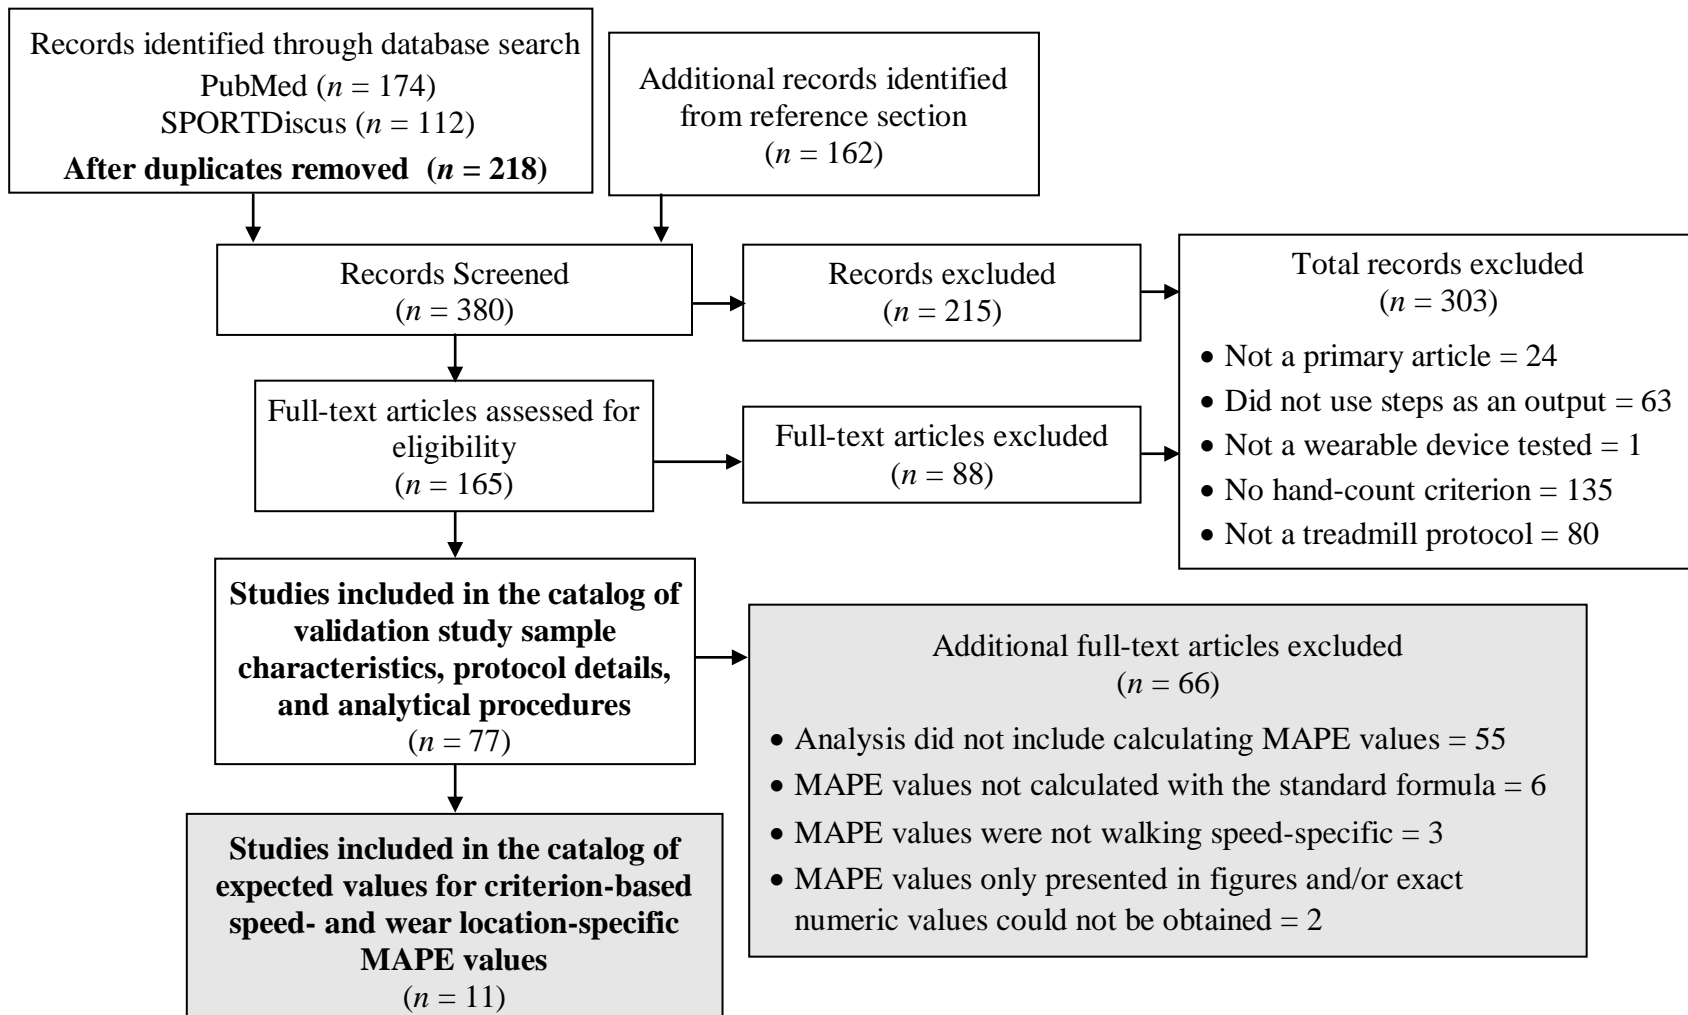

Supplement: NIHMS1647512-supplement-Supplementary_Material_1.pdf [file NIHMS1647512-supplement-Supplementary_Material_1.pdf]
