# Supplementary material
Source: PubMed Central journal article supplement (PMC7855895)
Supplement: NIHMS1647512-supplement-Supplementary_Material_2.pdf [file NIHMS1647512-supplement-Supplementary_Material_2.pdf]

**Supplementary Material 2.** Catalog of the 77 treadmill- and criterion-based validation studies of wearable step counting technologies that were included.

| <b>First Author and Year</b> | <b>Participant Characteristics</b>                                                 | <b>Treadmill Protocol Details</b>                                                                            | <b>Use Video*</b> | <b>Analytical Procedures</b>                                                                                           |
|------------------------------|------------------------------------------------------------------------------------|--------------------------------------------------------------------------------------------------------------|-------------------|------------------------------------------------------------------------------------------------------------------------|
| Abel 2008 <sup>1</sup>       | 10 men, 10 women; healthy adults; 29.4±7.1 years                                   | 3 walking bouts at 0.90-1.78 m/s; 3 running bouts at 2.23-3.13 m/s; 10 min each;                             | Yes               | <i>Bias:</i> percent of steps taken                                                                                    |
| Abel 2011 <sup>2</sup>       | 29 men, 30 women; healthy adults; 23.4±3.17 years                                  | 6 walking bouts at speeds of 0.98-0.78 m/s; 1 walking bout at a self-selected speed; 3 min each              | No                | <i>Bias:</i> percent error<br><i>Accuracy:</i> median absolute percent error                                           |
| Alsubheen 2016 <sup>3</sup>  | 8 men, 5 women; healthy adults; 40.0±11.9 years                                    | 3 walking bouts at a self-selected walking speed from 1.1-2.0 m/s with inclines of 0, 5 and 10%; 10 min each | No                | <i>Other:</i> difference in steps                                                                                      |
| An 2017 <sup>4</sup>         | 17 men, 18 women; healthy adults; 31±11.8 years                                    | 6 walking bouts with running as needed; speeds 0.89-2.24 m/s; 3 min each                                     | No                | <i>Bias:</i> Bland-Altman<br><i>Accuracy:</i> MAPE<br><i>Precision:</i> correlation<br><i>Other:</i> equivalence tests |
| Bassett 1996 <sup>5</sup>    | 5 men (34.6±10 years), 5 women (33.6±16 years); healthy adults                     | 5 walking bouts; speeds 0.90-1.78 m/s; 4 min each                                                            | No                | <i>Bias:</i> percent of steps taken<br><i>Precision:</i> standard deviation                                            |
| Beets 2005 <sup>6</sup>      | 10 boys (8.3±1.5 years), 10 girls (8.9±1.7 years); healthy children; 8.6±1.6 years | 5 walking bouts; speeds 0.67-1.57 m/s; 2 min each                                                            | No                | <i>Accuracy:</i> MAPE                                                                                                  |
| Beevi 2016 <sup>7</sup>      | 9 men, 5 women; healthy adults; 29.93±4.93 years                                   | 3 walking bouts; speeds 0.28-0.83 m/s; 100 steps each                                                        | No                | <i>Bias:</i> percent error<br><i>Precision:</i> standard deviation                                                     |
| Bergman 2012 <sup>8</sup>    | 10 men, 10 women; healthy adults; 21.85±1.57 years                                 | 5 walking bouts; speeds 0.90-1.78 m/s; 2 min each                                                            | No                | <i>Bias:</i> Bland-Altman<br><i>Precision:</i> standard error, correlation<br><i>Other:</i> difference in steps        |

|                             |                                                            |                                                                                                                       |     |                                                                                                                                |
|-----------------------------|------------------------------------------------------------|-----------------------------------------------------------------------------------------------------------------------|-----|--------------------------------------------------------------------------------------------------------------------------------|
| Brown 2013 <sup>9</sup>     | 15 men, 7 women; healthy adults; 28±7 years                | 1 constant 11-min walking bout at 1.33 m/s; up to 6 incrementally faster 2-min walking/running bouts at 0.90-3.57 m/s | Yes | <i>Bias:</i> modified Bland-Altman, percent error<br><i>Precision:</i> standard deviation<br><i>Other:</i> difference in steps |
| Case 2015 <sup>10</sup>     | 3 men, 11 women; healthy adults; 28.1±6.2 years            | 2 walking bouts; speeds 1.34 m/s; 500 and 1500 steps                                                                  | No  | <i>Bias:</i> percent error                                                                                                     |
| Chen 2016 <sup>11</sup>     | 15 men, 15 women; healthy adults; 22.1±2.2 years           | 3 walking bouts at 0.90-1.78 m/s; 1 running bout at 2.23 m/s; 5 min each                                              | Yes | <i>Bias:</i> Bland-Altman, percent of steps taken<br><i>Accuracy:</i> MAPE                                                     |
| Chow 2017 <sup>12</sup>     | 19 men, 12 women; healthy adults; 24.3±5.2 years           | 5 walking bouts with running as needed; speeds 1.39-3.33 m/s; 3 min each                                              | Yes | <i>Bias:</i> percent error<br><i>Precision:</i> standard deviation                                                             |
| Colley 2013 <sup>13</sup>   | 16 men, 24 women; healthy adults; 31.1±11.2 years          | 4 walking bouts with running as needed; speeds of 50%-250% of self-selected walking speed; 7 min each                 | No  | <i>Bias:</i> Bland-Altman, percent error                                                                                       |
| Connolly 2011 <sup>14</sup> | 30 pregnant women; 30.6±5.6 years                          | 4 walking bouts; speeds 0.90-1.57 m/s; 2 min each                                                                     | No  | <i>Bias:</i> Bland-Altman, percent of steps taken                                                                              |
| Crouter 2003 <sup>15</sup>  | 5 men, 5 women; healthy adults; 33±12 years                | 5 walking bouts; speeds 0.90-1.78 m/s; 5 min each                                                                     | No  | <i>Bias:</i> mean difference, percent of steps taken<br><i>Precision:</i> correlation                                          |
| Crouter 2005 <sup>16</sup>  | 20 men, 20 women; overweight and obese adults; 40±13 years | 5 walking bouts speeds 0.90-1.78 m/s; 3 min each;                                                                     | No  | <i>Bias:</i> mean difference, Bland-Altman, percent of steps taken                                                             |
| Dahlgren 2010 <sup>17</sup> | 12 men, 12 women; healthy adults; 22.5±2.2 years           | 3 walking bouts at 0.89-1.25 m/s; 1 running bout at 2.22 m/s; duration not reported                                   | Yes | <i>Bias:</i> mean difference<br><i>Precision:</i> standard deviation, correlation                                              |
| Diaz 2015 <sup>18</sup>     | 10 men, 13 women; healthy adults; 20-54 years              | 3 walking bouts at 0.85-1.79 m/s; 1 running bout at 2.32 m/s; 6 min each                                              | Yes | <i>Bias:</i> mean difference<br><i>Other:</i> difference in steps                                                              |

|                                |                                                                                                                                                                                          |                                                                                   |     |                                                                                                                                                                                                     |
|--------------------------------|------------------------------------------------------------------------------------------------------------------------------------------------------------------------------------------|-----------------------------------------------------------------------------------|-----|-----------------------------------------------------------------------------------------------------------------------------------------------------------------------------------------------------|
| Diaz 2016 <sup>19</sup>        | 10 men, 13 women;<br>healthy adults; 32±9.2<br>years                                                                                                                                     | 3 walking bouts at 0.85-<br>1.79 m/s; 1 running bout<br>at 2.32 m/s; 6 min each   | Yes | <i>Bias:</i> Bland-Altman, percent<br>error<br><i>Precision:</i> correlation                                                                                                                        |
| Dondzila<br>2012 <sup>20</sup> | 102 healthy adults;<br>proportion female not<br>reported; 53 from 20-<br>69 (32.9±10.8) years,<br>49 from 50-80<br>(65.4±6.9) years                                                      | 5 walking bouts; speeds<br>0.89-1.79 m/s; 5 min<br>each                           | No  | <i>Bias:</i> mean difference,<br>percent of steps taken                                                                                                                                             |
| Dueker<br>2012 <sup>21</sup>   | 7 boys, 10 girls;<br>healthy children;<br>12.8±1.7 years                                                                                                                                 | 3 walking bouts at 0.89-<br>1.79 m/s; 1 running bout<br>at 2.24 m/s; 3 min each   | No  | <i>Bias:</i> percent error<br><i>Precision:</i> standard<br>deviation                                                                                                                               |
| Duncan<br>2007 <sup>22</sup>   | 43 boys (19.0%<br>overweight, 7.1%<br>obese), 42 girls<br>(20.0% overweight,<br>10.0% obese); healthy<br>children; 36 from 5-7<br>(mean 6.1) years, 49<br>from 9-11 (mean<br>10.0) years | 3 walking bouts; speeds<br>0.70-1.50 m/s; 2 min<br>each                           | Yes | <i>Bias:</i> modified Bland-<br>Altman, percent error<br><i>Precision:</i> loss of precision                                                                                                        |
| Duncan<br>2017 <sup>23</sup>   | 11 men, 22 women;<br>healthy adults;<br>25.9±9.4 years                                                                                                                                   | 4 walking bouts with<br>running as needed:<br>speeds 0.69-2.78 m/s; 1<br>min each | Yes | <i>Bias:</i> modified Bland-<br>Altman, mean difference<br><i>Precision:</i> standard<br>deviation                                                                                                  |
| Dwyer<br>2009 <sup>24</sup>    | 20 men, 14 women;<br>adults with cystic<br>fibrosis and healthy<br>adults; 28±7 years                                                                                                    | 1 walking bout; at a<br>slightly faster than<br>comfortable pace; 20<br>min       | No  | <i>Bias:</i> Bland-Altman<br><i>Precision:</i> correlation<br><i>Other:</i> difference in steps                                                                                                     |
| Edbrooke<br>2012 <sup>25</sup> | 15 healthy adults;<br>proportion female not<br>reported; 22±7.8 years                                                                                                                    | 4 walking bouts; speeds<br>0.67-1.67 m/s; 3 min<br>each                           | Yes | <i>Bias:</i> mean difference<br><i>Precision:</i> standard error,<br>correlation                                                                                                                    |
| Esliger<br>2007 <sup>26</sup>  | 16 men, 22 women;<br>healthy adults;<br>34.3±18 years                                                                                                                                    | 2 walking bouts at 0.83-<br>1.38 m/s; 1 running bout<br>at 2.2 m/s; 6 min each    | No  | <i>Bias:</i> mean difference,<br>modified Bland-Altman<br><i>Precision:</i> coefficient of<br>variation, standard<br>deviation, standard error,<br>correlation<br><i>Other:</i> difference in steps |

|                                |                                                                                                                 |                                                                                        |     |                                                                                                                                   |
|--------------------------------|-----------------------------------------------------------------------------------------------------------------|----------------------------------------------------------------------------------------|-----|-----------------------------------------------------------------------------------------------------------------------------------|
| Feito 2012 <sup>27</sup>       | 32 men 39 women; 28 normal weight (27.8±8.0 years), 24 overweight (34.6±14.2 years), 19 obese (31.5±11.1 years) | 3 walking bouts; speeds 0.67-1.38 m/s; 5 min each                                      | No  | <i>Bias</i> : Bland-Altman, percent of steps taken<br><i>Precision</i> : correlation                                              |
| Feito 2012 <sup>28</sup>       | 28 men, 28 women; 21 normal weight (28.3±10.5 years), 19 overweight (31.2±9.9 years), 16 obese (29.0±7.9 years) | 5 walking bouts; speeds 0.67-1.38 m/s; 100 steps min each                              | No  | <i>Bias</i> : percent of steps taken<br><i>Precision</i> : standard deviation                                                     |
| Feito 2015 <sup>29</sup>       | 24 healthy adults; proportion female not reported; 23.8±8.8 years                                               | 5 walking bouts; speeds 0.67-1.38 m/s; 100 steps each                                  | No  | <i>Bias</i> : percent error<br><i>Precision</i> : standard deviation                                                              |
| Fokkema 2017 <sup>30</sup>     | 16 men, 15 women; healthy adults; 32±12 years                                                                   | 3 walking bouts speeds 0.89-1.78 m/s; 10 min each                                      | Yes | <i>Bias</i> : mean difference, percent error<br><i>Precision</i> : standard deviation, correlation                                |
| Foster 2005 <sup>31</sup>      | 10 men, 10 women; 10 normal weight (30±13 years), 10 obese (32±7 years)                                         | 3 walking bouts; speeds 0.45-1.34 m/s; 15 min each                                     | No  | <i>Bias</i> : percent of steps taken<br><i>Precision</i> : correlation                                                            |
| Furlanetto 2010 <sup>32</sup>  | 32 men, 28 women; 30 with COPD (67±8 years), 30 healthy (68±7) years                                            | 3 walking bouts; at 30-100% of average speed during a six-minute walk test; 1 min each | Yes | <i>Bias</i> : Bland-Altman<br><i>Precision</i> : standard deviation<br><i>Other</i> : difference in steps                         |
| Gaz 2018 <sup>33</sup>         | 10 men, 22 women; healthy adults; 36±8 years                                                                    | 3 walking bouts; speeds 0.67-1.57 m/s; 5 min each                                      | No  | <i>Bias</i> : mean difference<br><i>Precision</i> : standard deviation                                                            |
| Giannakidou 2012 <sup>34</sup> | 24 men, 18 women; healthy adults; 22.6±2.8 years                                                                | 5 walking bouts; speeds 0.9-1.78 m/s; 5 min each                                       | No  | <i>Bias</i> : percent of steps taken<br><i>Precision</i> : standard deviation<br><i>Accuracy</i> : root mean square percent error |
| Harrington 2011 <sup>35</sup>  | 0 men, 62 women; healthy adults; 18.5±3.4 years                                                                 | 5 walking bouts; speeds 0.89-1.94 m/s; 7 min each                                      | Yes | <i>Bias</i> : Bland-Altman<br><i>Precision</i> : standard deviation<br><i>Other</i> : difference in steps                         |

|                                 |                                                                                                                               |                                                                                                                                                                                              |     |                                                                                                                                               |
|---------------------------------|-------------------------------------------------------------------------------------------------------------------------------|----------------------------------------------------------------------------------------------------------------------------------------------------------------------------------------------|-----|-----------------------------------------------------------------------------------------------------------------------------------------------|
| Hasson<br>2009 <sup>36</sup>    | 44 men, 48 women;<br>healthy adults; 29±11<br>years; subset of 21<br>men, 23 women for<br>variable speed<br>walking condition | 3 walking bouts; speeds<br>1.12-1.56 m/s; 12 min<br>each; 1 walking bout<br>variable speeds (1.12-<br>2.50 m/s); 18 min of<br>walking with three<br>standing rests                           | No  | <i>Bias:</i> percent error<br><i>Precision:</i> standard<br>deviation (random error)                                                          |
| Hickey<br>2016 <sup>37</sup>    | 7 men, 8 women;<br>healthy adults;<br>24.9±5.1 years                                                                          | 3 walking bouts at 0.67-<br>2.00 m/s; 1 running bout<br>at 2.68 m/s; 5 min each                                                                                                              | Yes | <i>Bias:</i> mean difference<br><i>Precision:</i> standard<br>deviation                                                                       |
| Hiebert<br>2010 <sup>38</sup>   | 9 men, 9 women;<br>healthy adults;<br>20.6±4.6 years                                                                          | 9 walking bouts; all at<br>1.48 m/s with each<br>combination of incline<br>(level, inclined, and<br>declined) and footwear<br>("tennis shoes", "flip<br>flops", and no shoes); 3<br>min each | No  | <i>Other:</i> difference in steps                                                                                                             |
| Hochsmann<br>2018 <sup>39</sup> | 6 men, 14 women;<br>healthy adults; 10<br>from 18-25<br>(median=22) years,<br>10 from 45-70<br>(median=53) years              | 4 bouts; 5 min each;<br>walking speeds 0.44-<br>1.67 m/s                                                                                                                                     | No  | <i>Bias:</i> mean difference<br><i>Accuracy:</i> MAPE                                                                                         |
| Imboden<br>2018 <sup>40</sup>   | 15 men, 15 women;<br>healthy adults;<br>49.2±19.2 years                                                                       | 1 walking bout and/or 1<br>running bout at self-<br>selected speeds; self-<br>selected durations of 2-<br>15 min                                                                             | No  | <i>Bias:</i> Bland-Altman, mean<br>difference, percent error<br><i>Precision:</i> standard<br>deviation, correlation<br><i>Accuracy:</i> MAPE |
| Huang<br>2016 <sup>41</sup>     | 7 men, 3 women;<br>healthy adults;<br>23.6±2.1 years                                                                          | 3 walking bouts; speeds<br>0.90-1.78 m/s; 3 min<br>each                                                                                                                                      | Yes | <i>Bias:</i> percent error                                                                                                                    |
| Johnson<br>2015 <sup>42</sup>   | 20 men, 23 women;<br>healthy adults;<br>20.98±1.17 years                                                                      | 3 walking bouts; speeds<br>0.89-2.01 m/s; 5 min<br>each                                                                                                                                      | No  | <i>Bias:</i> Bland-Altman, percent<br>error<br><i>Precision:</i> standard<br>deviation<br><i>Other:</i> difference in steps                   |
| Jones<br>2018 <sup>43</sup>     | 12 men, 18 women;<br>healthy adults; 33±8<br>years                                                                            | 5 running bouts; 4 min<br>each; running speeds<br>2.22-4.44 m/s                                                                                                                              | No  | <i>Precision:</i> 95% confidence<br>interval, correlation<br><i>Accuracy:</i> MAPE                                                            |

|                                      |                                                                             |                                                                                      |     |                                                                                                                                                                                   |
|--------------------------------------|-----------------------------------------------------------------------------|--------------------------------------------------------------------------------------|-----|-----------------------------------------------------------------------------------------------------------------------------------------------------------------------------------|
| Kanoun<br>2009 <sup>44</sup>         | 9 men, 33 women;<br>healthy adults; 23.5±4<br>years                         | 4 walking bouts; speeds<br>0.45-1.33 m/s; 5 min<br>each                              | No  | <i>Bias</i> : Bland-Altman, percent<br>error<br><i>Precision</i> : standard<br>deviation<br><i>Accuracy</i> : MAPE                                                                |
| Karabulut<br>2005 <sup>45</sup>      | 10 men, 10 women;<br>healthy adults; 28±3.7<br>years                        | 6 walking bouts; speeds<br>0.45-1.78 m/s; 3 min<br>each                              | No  | <i>Bias</i> : Bland-Altman, percent<br>of steps taken<br><i>Precision</i> : standard<br>deviation                                                                                 |
| Kumahara<br>2015 <sup>46</sup>       | 0 men, 9 women;<br>healthy adults;<br>21.6±0.5 years                        | 4 walking bouts; speeds<br>0.92-1.67 m/s; 6 min<br>each                              | Yes | <i>Bias</i> : percent error<br><i>Precision</i> : standard<br>deviation                                                                                                           |
| Larkin<br>2016 <sup>47</sup>         | 3 men, 17 women;<br>adults with<br>rheumatoid arthritis;<br>55±14 years     | 1 walking bout; at a<br>self-selected normal<br>pace; 2-5 min<br>(randomly selected) | Yes | <i>Bias</i> : percent error<br><i>Precision</i> : standard<br>deviation, correlation<br><i>Other</i> : difference in steps                                                        |
| Le<br>Masurier<br>2003 <sup>48</sup> | 13 men (30.0±6.1<br>years), 7 women<br>(26.4±3.6 years);<br>healthy adults  | 5 walking bouts; speeds<br>0.90-1.78 m/s; 5 min<br>each;                             | Yes | <i>Bias</i> : percent of steps taken<br><i>Precision</i> : standard<br>deviation<br><i>Other</i> : difference in steps                                                            |
| Le<br>Masurier<br>2004 <sup>49</sup> | 6 men (30.5±6.6<br>years), 6 women<br>(27.7±6.3 years);<br>healthy adults   | 5 walking bouts; speeds<br>0.90-1.78 m/s; 5 min<br>each                              | Yes | <i>Bias</i> : mean difference,<br>proportion devices<br>under/overestimating,<br>percent error<br><i>Accuracy</i> : MAPE                                                          |
| Lee 2015 <sup>50</sup>               | 22 men (20.9±1.9<br>years), 21 women<br>(20.9±2.1 years);<br>healthy adults | 5 walking bouts; speeds<br>0.89-1.78 m/s; 3 min<br>each                              | No  | <i>Bias</i> : mean difference,<br>modified Bland-Altman,<br>percent of steps taken<br><i>Precision</i> : standard<br>deviation, correlation<br><i>Other</i> : difference in steps |
| Lee 2015 <sup>51</sup>               | 17 men (22.2±1.5<br>years), 22 women<br>(21.1±1.6 years);<br>healthy adults | 5 walking bouts; speeds<br>0.90-1.78 m/s; 3 min<br>each                              | No  | <i>Bias</i> : Bland-Altman, percent<br>of steps taken, mean<br>difference<br><i>Precision</i> : standard error,<br>correlation<br><i>Other</i> : difference in steps              |
| Leicht<br>2009 <sup>52</sup>         | 22 men, 24 women;<br>healthy adults; age not<br>reported                    | 1 walking bout; at a<br>self-selected normal<br>pace; 3 min                          | No  | <i>Bias</i> : mean difference,<br>percent error<br><i>Accuracy</i> : MAPE                                                                                                         |

|                                |                                                                                                                                                    |                                                                                                                                   |     |                                                                                                                                                   |
|--------------------------------|----------------------------------------------------------------------------------------------------------------------------------------------------|-----------------------------------------------------------------------------------------------------------------------------------|-----|---------------------------------------------------------------------------------------------------------------------------------------------------|
| Leong<br>2017 <sup>53</sup>    | 13 men, 35 women;<br>healthy adults;<br>22.5±1.4 years                                                                                             | 5 walking bouts; speeds<br>0.89-1.79 m/s; 3 min<br>each                                                                           | No  | <i>Bias</i> : mean difference<br><i>Accuracy</i> : MAPE<br><i>Other</i> : equivalence tests                                                       |
| Lutzner<br>2014 <sup>54</sup>  | 25 men, 18 women;<br>healthy adults;<br>24.3±5.2 years                                                                                             | 5 walking bouts at 0.9-<br>1.8 m/s; 1 running bout<br>at 2.3 m/s; 5 min each                                                      | Yes | <i>Bias</i> : Bland-Altman, percent<br>error                                                                                                      |
| Maddocks<br>2010 <sup>55</sup> | 15 men, 25 women;<br>healthy adults; 28±8<br>years                                                                                                 | 5 walking bouts; speeds<br>0.6-1.4 m/s; 5 min each                                                                                | Yes | <i>Accuracy</i> : MAPE<br><i>Other</i> : difference in steps,<br>number of erroneous steps                                                        |
| Mammen<br>2012 <sup>56</sup>   | 5 men, 5 women;<br>healthy adults; 23±1.2<br>years                                                                                                 | 5 walking bouts at 0.56-<br>1.67 m/s; 4 running<br>bouts at 2.22-3.06 m/s;<br>1 min each                                          | Yes | <i>Bias</i> : mean difference,<br>proportion devices<br>under/overestimating,<br>percent error<br><i>Other</i> : difference in steps              |
| Melanson<br>2004 <sup>57</sup> | 108 men, 151 women;<br>healthy adults; 19-85<br>years; subset of 16<br>men, 16 women for<br>bouts with speeds<br>controlled across<br>participants | 2 walking bouts at a<br>self-selected normal and<br>brisk pace; 10 min each;<br>3 walking bouts at 0.45-<br>1.16 m/s; 12 min each | No  | <i>Bias</i> : percent of steps taken<br><i>Precision</i> : standard<br>deviation                                                                  |
| Mitre<br>2009 <sup>58</sup>    | 13 men, 14 women;<br>obese and normal<br>weight adults; 11±1<br>years                                                                              | 4 walking bouts; speeds<br>0.22-0.89 m/s; 5 min<br>each                                                                           | No  | <i>Bias</i> : Bland-Altman, percent<br>of steps taken                                                                                             |
| Montes<br>2018 <sup>59</sup>   | 26 men, 23 women;<br>healthy adults;<br>23.4±6.6 years                                                                                             | 3 walking bouts; speeds<br>0.67-1.57 m/s; 3 min<br>each                                                                           | No  | <i>Precision</i> : correlation                                                                                                                    |
| Motl<br>2011 <sup>60</sup>     | 48 men, 20 women;<br>24 adults with<br>multiple sclerosis<br>(43.5±12.2 years), 24<br>healthy adults<br>(40.9±11.4 years)                          | 3 walking bouts; speeds<br>0.9-1.78 m/s; 6 min<br>each                                                                            | No  | <i>Bias</i> : percent of steps taken<br><i>Precision</i> : standard<br>deviation                                                                  |
| Nelson<br>2016 <sup>61</sup>   | 15 men, 15 women;<br>10 healthy adults in<br>each of three age-<br>groups (18–39, 40–<br>59, and 60–80 years);<br>overall 48.9±19.4<br>years       | 1 walking bouts at a<br>self-selected speed; 1<br>running bout at a self-<br>selected speed; 5 min<br>each                        | No  | <i>Precision</i> : 95% confidence<br>interval<br><i>Accuracy</i> : MAPE, root<br>mean square error<br><i>Other</i> : number of erroneous<br>steps |

|                                           |                                                                               |                                                                                                                                              |     |                                                                                                                                            |
|-------------------------------------------|-------------------------------------------------------------------------------|----------------------------------------------------------------------------------------------------------------------------------------------|-----|--------------------------------------------------------------------------------------------------------------------------------------------|
| Nielson<br>2011 <sup>62</sup>             | 50 men, 50 women;<br>healthy adults;<br>23.3±3.9 years                        | 5 walking bouts; at 80-<br>120 steps/min; 6 min<br>each                                                                                      | No  | <i>Precision:</i> standard<br>deviation<br><i>Other:</i> difference in steps                                                               |
| Oliver<br>2011 <sup>63</sup>              | 1 men, 9 women;<br>healthy adults; age not<br>reported                        | 3 walking bouts; speeds<br>0.90-1.78 m/s; 5 min<br>each                                                                                      | No  | <i>Bias:</i> Bland-Altman, percent<br>error<br><i>Precision:</i> standard<br>deviation, variance,<br>correlation                           |
| Park 2014 <sup>64</sup>                   | 20 men (38.1±13.4<br>years), 20 women<br>(39.1±14.0 years);<br>healthy adults | 5 walking bouts with<br>running as needed;<br>speeds 0.90-2.23 m/s; 6<br>min each                                                            | No  | <i>Bias:</i> percent error<br><i>Precision:</i> standard<br>deviation                                                                      |
| Ramirez-<br>Marrero<br>2002 <sup>65</sup> | 14 men, 17 women;<br>healthy adults;<br>8.8±1.4 years                         | 3 walking bouts; at a<br>self-selected slow,<br>normal, and fast pace; 2<br>min each                                                         | No  | <i>Bias:</i> percent of steps taken<br><i>Precision:</i> standard<br>deviation<br><i>Other:</i> difference in steps                        |
| Rosenkranz<br>2011 <sup>66</sup>          | 12 men, 7 women;<br>healthy adults;<br>9.6±1.2 years                          | 3 walking bouts with<br>running as needed;<br>speeds 0.67-2.01 m/s; 3<br>min each                                                            | Yes | <i>Bias:</i> Bland-Altman, mean<br>difference<br><i>Precision:</i> standard<br>deviation, correlation<br><i>Other:</i> difference in steps |
| Rowlands<br>2007 <sup>67</sup>            | 10 men, 0 women;<br>healthy adults;<br>23.1±3.4 years                         | 2 walking bouts at 1.11-<br>1.67 m/s; 5 running<br>bouts at 2.78-5.0 m/s; 1<br>min each; 4 running<br>bouts at 5.56-7.22 m/s;<br>30 sec each | No  | <i>Other:</i> difference in steps                                                                                                          |
| Ryan<br>2006 <sup>68</sup>                | 8 men, 12 women;<br>healthy adults;<br>34.5±6.9 years                         | 5 walking bouts; speeds<br>0.90-1.78 m/s; 5 min<br>each                                                                                      | Yes | <i>Bias:</i> Bland-Altman, percent<br>error<br><i>Precision:</i> standard<br>deviation, correlation<br><i>Accuracy:</i> MAPE               |
| Ryan<br>2008 <sup>69</sup>                | 1 man, 9 women;<br>adults with chronic<br>lower back pain;<br>51±10 years     | 1 walking bouts at a<br>self-selected speed; 5-6<br>min each                                                                                 | Yes | <i>Bias:</i> Bland-Altman<br><i>Precision:</i> 95% confidence<br>interval                                                                  |



|                                       |                                                                                                                          |                                                                                                                            |     |                                                                                                                                                                                       |
|---------------------------------------|--------------------------------------------------------------------------------------------------------------------------|----------------------------------------------------------------------------------------------------------------------------|-----|---------------------------------------------------------------------------------------------------------------------------------------------------------------------------------------|
| Sears<br>2017 <sup>70</sup>           | 5 men, 5 women;<br>healthy adults;<br>23.3±5.2 years                                                                     | 5 walking bouts; speeds<br>0.89-1.79 m/s; 5 min<br>each                                                                    | No  | <i>Bias:</i> mean difference,<br>percent error<br><i>Precision:</i> standard<br>deviation, correlation<br><i>Other:</i> difference in steps                                           |
| Stackpool<br>2014 <sup>71</sup>       | 10 men (21.5±1.4<br>years), 10 women<br>(22.5±1.3 years);<br>healthy adults                                              | 1 walking bout at a self-<br>selected speed; 1<br>running bout at a self-<br>selected speed; 20 min<br>each                | No  | <i>Bias:</i> percent error<br><i>Precision:</i> standard<br>deviation, correlation                                                                                                    |
| Stansfield<br>2015 <sup>72</sup>      | 10 men, 10 women;<br>healthy adults; 36±10<br>years                                                                      | 10 walking bouts;<br>speeds 0.1-1 m/s; 5 min<br>each                                                                       | Yes | <i>Bias:</i> percent of steps taken                                                                                                                                                   |
| Steeves<br>2011 <sup>73</sup>         | 31 men, 29 women;<br>obese and healthy<br>adults; 35±12.8 years;<br>subset of 20 healthy<br>adults for running<br>trials | 3 walking bouts at 0.89-<br>1.79 m/s; 3 running<br>bouts at 2.68-3.58 m/s;<br>100 steps each                               | No  | <i>Bias:</i> percent of steps taken                                                                                                                                                   |
| Sushames<br>2016 <sup>74</sup>        | 13 men, 12 women;<br>healthy adults;<br>23.7±5.8 years                                                                   | 1 walking bout at a self-<br>selected Borg RPE of 4;<br>1 running bout at a self-<br>selected Borg RPE of 7;<br>6 min each | Yes | <i>Bias:</i> Bland-Altman, mean<br>difference<br><i>Precision:</i> coefficient of<br>variation<br><i>Other:</i> difference in steps                                                   |
| Takacs<br>2014 <sup>75</sup>          | 15 men, 15 women;<br>healthy adults;<br>29.6±5.7 years                                                                   | 5 walking bouts; speeds<br>0.90-1.78 m/s; 5 min<br>each                                                                    | Yes | <i>Bias:</i> Bland-Altman<br><i>Precision:</i> standard<br>deviation, correlation<br><i>Accuracy:</i> MAPE                                                                            |
| Tam 2018 <sup>76</sup>                | 15 men, 15 women;<br>healthy adults;<br>32.1±8.7 years                                                                   | 5 walking bouts; speeds<br>0.90-1.78 m/s; 5 min<br>each                                                                    | No  | <i>Bias:</i> mean difference,<br>percent error, Bland-Altman<br><i>Precision:</i> standard<br>deviation, 95% confidence<br>interval, correlation<br><i>Other:</i> difference in steps |
| Tudor-<br>Locke<br>2006 <sup>77</sup> | 9 healthy adults;<br>proportion female and<br>age reported                                                               | 1 walking bout; speed<br>of 1.33 m/s; duration<br>not reported                                                             | Yes | <i>Bias:</i> percent error,<br>proportion devices<br>under/overestimating<br><i>Accuracy:</i> MAPE<br><i>Other:</i> difference in steps                                               |

---

Any apparent inconsistencies in reporting of table values (e.g., age ranges vs. means, number of decimal points etc.) reflect discrepancies in reporting conventions between original articles

Ages presented as mean $\pm$ SD years except where only ranges reported (min-max years) or otherwise noted

\*Use of video indicates whether video back-up recording of directly-observed steps was implemented

Abbreviations: MAPE = mean absolute percentage error

## References for Supplemental File 2

1. Abel MG, Hannon JC, Sell K, Lillie T, Conlin G, Anderson D. Validation of the Kenz Lifecorder EX and ActiGraph GT1M accelerometers for walking and running in adults. *Appl Physiol Nutr Metab.* 2008;33(6):1155-1164.
2. Abel MG, Peritore N, Shapiro R, Mullineaux DR, Rodriguez K, Hannon JC. A comprehensive evaluation of motion sensor step-counting error. *Appl Physiol Nutr Metab.* 2011;36(1):166-170.
3. Alsubheen SA, George AM, Baker A, Rohr LE, Basset FA. Accuracy of the vivofit activity tracker. *J Med Eng Technol.* 2016;40(6):298-306.
4. An HS, Jones GC, Kang SK, Welk GJ, Lee JM. How valid are wearable physical activity trackers for measuring steps? *Eur J Sport Sci.* 2017;17(3):360-368.
5. Bassett DR, Jr., Ainsworth BE, Leggett SR, et al. Accuracy of five electronic pedometers for measuring distance walked. *Med Sci Sports Exerc.* 1996;28(8):1071-1077.
6. Beets MW, Patton MM, Edwards S. The accuracy of pedometer steps and time during walking in children. *Med Sci Sports Exerc.* 2005;37(3):513-520.
7. Beevi FH, Miranda J, Pedersen CF, Wagner S. An Evaluation of Commercial Pedometers for Monitoring Slow Walking Speed Populations. *Telemed J E Health.* 2016;22(5):441-449.
8. Bergman RJ, Spellman JW, Hall ME, Bergman SM. Is there a valid app for that? Validity of a free pedometer iPhone application. *J Phys Act Health.* 2012;9(5):670-676.
9. Brown DK, Grimwade D, Martinez-Bussion D, Taylor MJ, Gladwell VF. The validity of the ActiPed for physical activity monitoring. *Int J Sports Med.* 2013;34(5):431-437.
10. Case MA, Burwick HA, Volpp KG, Patel MS. Accuracy of smartphone applications and wearable devices for tracking physical activity data. *JAMA.* 2015;313(6):625-626.

11. Chen MD, Kuo CC, Pellegrini CA, Hsu MJ. Accuracy of Wristband Activity Monitors during Ambulation and Activities. *Med Sci Sports Exerc.* 2016;48(10):1942-1949.
12. Chow JJ, Thom JM, Wewege MA, Ward RE, Parmenter BJ. Accuracy of step count measured by physical activity monitors: The effect of gait speed and anatomical placement site. *Gait Posture.* 2017;57:199-203.
13. Colley RC, Barnes JD, Leblanc AG, Borghese M, Boyer C, Tremblay MS. Validity of the SC-StepMX pedometer during treadmill walking and running. *Appl Physiol Nutr Metab.* 2013;38(5):520-524.
14. Connolly CP, Coe DP, Kendrick JM, Bassett DR, Jr., Thompson DL. Accuracy of physical activity monitors in pregnant women. *Med Sci Sports Exerc.* 2011;43(6):1100-1105.
15. Crouter SE, Schneider PL, Karabulut M, Bassett DR, Jr. Validity of 10 electronic pedometers for measuring steps, distance, and energy cost. *Med Sci Sports Exerc.* 2003;35(8):1455-1460.
16. Crouter SE, Schneider PL, Bassett DR, Jr. Spring-levered versus piezo-electric pedometer accuracy in overweight and obese adults. *Med Sci Sports Exerc.* 2005;37(10):1673-1679.
17. Dahlgren G, Carlsson D, Moorhead A, Hager-Ross C, McDonough SM. Test-retest reliability of step counts with the ActivPAL device in common daily activities. *Gait Posture.* 2010;32(3):386-390.
18. Diaz KM, Krupka DJ, Chang MJ, et al. Fitbit(R): An accurate and reliable device for wireless physical activity tracking. *Int J Cardiol.* 2015;185:138-140.
19. Diaz KM, Krupka DJ, Chang MJ, et al. Validation of the Fitbit One(R) for physical activity measurement at an upper torso attachment site. *BMC Res Notes.* 2016;9:213.

20. Dondzila CJ, Swartz AM, Miller NE, Lenz EK, Strath SJ. Accuracy of uploadable pedometers in laboratory, overground, and free-living conditions in young and older adults. *Int J Behav Nutr Phys Act.* 2012;9:143.
21. Dueker D, Gauderman WJ, McConnell R. Accuracy of a new time-resolved step counter in children. *Pediatr Exerc Sci.* 2012;24(4):622-633.
22. Duncan JS, Schofield G, Duncan EK, Hinckson EA. Effects of age, walking speed, and body composition on pedometer accuracy in children. *Res Q Exerc Sport.* 2007;78(5):420-428.
23. Duncan MJ, Wunderlich K, Zhao Y, Faulkner G. Walk this way: validity evidence of iphone health application step count in laboratory and free-living conditions. *J Sports Sci.* 2017:1-10.
24. Dwyer TJ, Alison JA, McKeough ZJ, Elkins MR, Bye PT. Evaluation of the SenseWear activity monitor during exercise in cystic fibrosis and in health. *Respir Med.* 2009;103(10):1511-1517.
25. Edbrooke L, Lythgo N, Goldsworthy U, Denehy L. Can an accelerometer-based monitor be used to accurately assess physical activity in a population of survivors of critical illness? *Glob J Health Sci.* 2012;4(3):98-107.
26. Esliger DW, Probert A, Connor Gorber S, Bryan S, Laviolette M, Tremblay MS. Validity of the Actical accelerometer step-count function. *Med Sci Sports Exerc.* 2007;39(7):1200-1204.
27. Feito Y, Bassett DR, Thompson DL, Tyo BM. Effects of body mass index on step count accuracy of physical activity monitors. *J Phys Act Health.* 2012;9(4):594-600.
28. Feito Y, Bassett DR, Thompson DL. Evaluation of activity monitors in controlled and free-living environments. *Med Sci Sports Exerc.* 2012;44(4):733-741.

29. Feito Y, Garner HR, Bassett DR. Evaluation of ActiGraph's low-frequency filter in laboratory and free-living environments. *Med Sci Sports Exerc.* 2015;47(1):211-217.
30. Fokkema T, Kooiman TJ, Krijnen WP, CP VDS, M DEG. Reliability and Validity of Ten Consumer Activity Trackers Depend on Walking Speed. *Med Sci Sports Exerc.* 2017;49(4):793-800.
31. Foster RC, Lanningham-Foster LM, Manohar C, et al. Precision and accuracy of an ankle-worn accelerometer-based pedometer in step counting and energy expenditure. *Prev Med.* 2005;41(3-4):778-783.
32. Furlanetto KC, Bisca GW, Oldenberg N, et al. Step counting and energy expenditure estimation in patients with chronic obstructive pulmonary disease and healthy elderly: accuracy of 2 motion sensors. *Arch Phys Med Rehabil.* 2010;91(2):261-267.
33. Gaz DV, Rieck TM, Peterson NW, et al. Determining the Validity and Accuracy of Multiple Activity-Tracking Devices in Controlled and Free-Walking Conditions. *Am J Health Promot.* 2018;32(8):1671-1678.
34. Giannakidou DM, Kambas A, Ageloussis N, et al. The validity of two Omron pedometers during treadmill walking is speed dependent. *Eur J Appl Physiol.* 2012;112(1):49-57.
35. Harrington DM, Welk GJ, Donnelly AE. Validation of MET estimates and step measurement using the ActivPAL physical activity logger. *J Sports Sci.* 2011;29(6):627-633.
36. Hasson RE, Haller J, Pober DM, Staudenmayer J, Freedson PS. Validity of the Omron HJ-112 pedometer during treadmill walking. *Med Sci Sports Exerc.* 2009;41(4):805-809.
37. Hickey A, John D, Sasaki JE, Mavilia M, Freedson P. Validity of Activity Monitor Step Detection Is Related to Movement Patterns. *J Phys Act Health.* 2016;13(2):145-153.

38. Hiebert JM, Hoover DL, Connelly A, Hollis J, Marlow J, Schneider N. Effects Of Footwear And Grade Conditions On Pedometer Accuracy. *J Strength Cond Res.* 2010;24:1-1.
39. Hochsmann C, Knaier R, Eymann J, Hintermann J, Infanger D, Schmidt-Trucksass A. Validity of activity trackers, smartphones, and phone applications to measure steps in various walking conditions. *Scand J Med Sci Sports.* 2018;28(7):1818-1827.
40. Imboden MT, Nelson MB, Kaminsky LA, Montoye AH. Comparison of four Fitbit and Jawbone activity monitors with a research-grade ActiGraph accelerometer for estimating physical activity and energy expenditure. *Br J Sports Med.* 2018;52(13):844-850.
41. Huang Y, Xu J, Yu B, Shull PB. Validity of FitBit, Jawbone UP, Nike+ and other wearable devices for level and stair walking. *Gait Posture.* 2016;48:36-41.
42. Johnson M, Meltz K, Hart K, Schmudlach M, Clarkson L, Borman K. Validity of the Actical activity monitor for assessing steps and energy expenditure during walking. *J Sports Sci.* 2015;33(8):769-776.
43. Jones D, Crossley K, Dascombe B, Hart HF, Kemp J. Validity and Reliability Of The Fitbit Flex™ And ActiGraph GT3X+ At Jogging and Running Speeds. *Int J Sports Phys Ther.* 2018;13(5):860-870.
44. Kanoun N. Validation of the ActivPAL Activity Monitor as a Measure of Walking at Pre-determined Slow Walking Speeds in a Healthy Population in a Controlled Setting. *Reinvention: an International Journal of Undergraduate Research.* 2009;2(2).
45. Karabulut M, Crouter SE, Bassett DR, Jr. Comparison of two waist-mounted and two ankle-mounted electronic pedometers. *Eur J Appl Physiol.* 2005;95(4):335-343.

46. Kumahara H, Ayabe M, Ichibakase M, Tashima A, Chiwata M, Takashi T. Validity of activity monitors worn at multiple nontraditional locations under controlled and free-living conditions in young adult women. *Appl Physiol Nutr Metab*. 2015;40(5):448-456.
47. Larkin L, Nordgren B, Purtill H, Brand C, Fraser A, Kennedy N. Criterion Validity of the activPAL Activity Monitor for Sedentary and Physical Activity Patterns in People Who Have Rheumatoid Arthritis. *Phys Ther*. 2016;96(7):1093-1101.
48. Le Masurier GC, Tudor-Locke C. Comparison of pedometer and accelerometer accuracy under controlled conditions. *Med Sci Sports Exerc*. 2003;35(5):867-871.
49. Le Masurier GC, Lee SM, Tudor-Locke C. Motion sensor accuracy under controlled and free-living conditions. *Med Sci Sports Exerc*. 2004;36(5):905-910.
50. Lee JA, Williams SM, Brown DD, Laurson KR. Concurrent validation of the Actigraph gt3x+, Polar Active accelerometer, Omron HJ-720 and Yamax Digiwalker SW-701 pedometer step counts in lab-based and free-living settings. *J Sports Sci*. 2015;33(10):991-1000.
51. Lee JA, Laurson KR. Validity of the SenseWear armband step count measure during controlled and free-living conditions. *J Exerc Sci Fit*. 2015;13(1):16-23.
52. Leicht AS, Crowther RG. Influence of non-level walking on pedometer accuracy. *J Sci Med Sport*. 2009;12(3):361-365.
53. Leong JY, Wong JE. Accuracy of three Android-based pedometer applications in laboratory and free-living settings. *J Sports Sci*. 2017;35(1):14-21.
54. Lutzner C, Voigt H, Roeder I, Kirschner S, Lutzner J. Placement makes a difference: accuracy of an accelerometer in measuring step number and stair climbing. *Gait Posture*. 2014;39(4):1126-1132.



55. Maddocks M, Petrou A, Skipper L, Wilcock A. Validity of three accelerometers during treadmill walking and motor vehicle travel. *Br J Sports Med.* 2010;44(8):606-608.
56. Mammen G, Gardiner S, Senthinathan S, McClellmont L, Stone M, Faulkner G. Is this Bit Fit? Measuring the Quality of the Fitbit Step-Counter. *Health & Fitness Journal of Canada.* 2012;5(4):30-39.
57. Melanson EL, Knoll JR, Bell ML, et al. Commercially available pedometers: considerations for accurate step counting. *Prev Med.* 2004;39(2):361-368.
58. Mitre N, Lanningham-Foster L, Foster R, Levine JA. Pedometer accuracy for children: can we recommend them for our obese population? *Pediatrics.* 2009;123(1):e127-131.
59. Montes J, Young JC, Tandy R, Navalta JW. Reliability and Validation of the Hexoskin Wearable Bio-Collection Device During Walking Conditions. *Int J Exerc Sci.* 2018;11(7):806-816.
60. Motl RW, Snook EM, Agiovlasitis S. Does an accelerometer accurately measure steps taken under controlled conditions in adults with mild multiple sclerosis? *Disabil Health J.* 2011;4(1):52-57.
61. Nelson MB, Kaminsky LA, Dickin DC, Montoye AH. Validity of Consumer-Based Physical Activity Monitors for Specific Activity Types. *Med Sci Sports Exerc.* 2016;48(8):1619-1628.
62. Nielson R, Vehrs PR, Fellingham GW, Hager R, Prusak KA. Step counts and energy expenditure as estimated by pedometry during treadmill walking at different stride frequencies. *J Phys Act Health.* 2011;8(7):1004-1013.
63. Oliver M, Badland H, Shepherd J, Schofield GM. Counting steps in research: A comparison of accelerometry and pedometry. *Open J Prev Med.* 2011;1(1):1-7.

64. Park W, Lee VJ, Ku B, Tanaka H. Effect of walking speed and placement position interactions in determining the accuracy of various newer pedometers. *J Exerc Sci Fit.* 2014;12(1):31-37.
65. Ramirez-Marrero FA, Smith BA, Kirby TE, Leenders N, Sherman WM. Evaluation of a step-counter during treadmill walking in 7-12 year old African-American children. *J Natl Black Nurses Assoc.* 2002;13(1):1-5.
66. Rosenkranz RR, Rosenkranz SK, Weber C. Validity of the Actical accelerometer step-count function in children. *Pediatr Exerc Sci.* 2011;23(3):355-365.
67. Rowlands AV, Stone MR, Eston RG. Influence of speed and step frequency during walking and running on motion sensor output. *Med Sci Sports Exerc.* 2007;39(4):716-727.
68. Ryan CG, Grant PM, Tigbe WW, Granat MH. The validity and reliability of a novel activity monitor as a measure of walking. *Br J Sports Med.* 2006;40(9):779-784.
69. Ryan CG, Grant PM, Gray H, Newton M, Granat MH. Measuring postural physical activity in people with chronic low back pain. *J Back Musculoskelet Rehabil.* 2008;21(1):43-50.
70. Sears T, Avalos E, Lawson S, McAlister I, Eschbach ‡ C, Bunn J. Wrist-worn Physical Activity Trackers Tend to Underestimate Steps During Walking. *Int J Exerc Sci.* 2017;10:764-773.
71. Stackpool CM, Porcari JP, Mikat RP, Gillette C, Foster C. The Accuracy of Various Activity Trackers in Estimating Steps Taken and Energy Expenditure. *Journal of Fitness Research.* 2014;3(3):32-48.
72. Stansfield B, Hajarnis M, Sudarshan R. Characteristics of very slow stepping in healthy adults and validity of the activPAL3 activity monitor in detecting these steps. *Med Eng Phys.* 2015;37(1):42-47.

73. Steeves JA, Tyo BM, Connolly CP, Gregory DA, Stark NA, Bassett DR. Validity and reliability of the Omron HJ-303 tri-axial accelerometer-based pedometer. *J Phys Act Health*. 2011;8(7):1014-1020.
74. Sushames A, Edwards A, Thompson F, McDermott R, Gebel K. Validity and Reliability of Fitbit Flex for Step Count, Moderate to Vigorous Physical Activity and Activity Energy Expenditure. *PLoS One*. 2016;11(9):e0161224.
75. Takacs J, Pollock CL, Guenther JR, Bahar M, Napier C, Hunt MA. Validation of the Fitbit One activity monitor device during treadmill walking. *J Sci Med Sport*. 2014;17(5):496-500.
76. Tam KM, Cheung SY. Validation of Electronic Activity Monitor Devices During Treadmill Walking. *Telemed J E Health*. 2018;24(10):782-789.
77. Tudor-Locke C, Sisson SB, Lee SM, Craig CL, Plotnikoff RC, Bauman A. Evaluation of quality of commercial pedometers. *Can J Public Health*. 2006;97 Suppl 1:S10-15, S10-16.
