# Supplementary material
Source: PubMed Central journal article supplement (PMC7855895)
Supplement: NIHMS1647512-supplement-Supplementary_Material_4.pdf [file NIHMS1647512-supplement-Supplementary_Material_4.pdf]

**Supplementary Material 4.** Descriptions of treadmill-based validation studies from which speed- and wear location-specific mean absolute percentage error (MAPE) values were obtained.

| Study                          | <i>n</i> | Person-bouts <sup>†</sup> | Device Makes/Models Tested by Wear Location                                                                                                                                                                                        | Walking Speeds                   |
|--------------------------------|----------|---------------------------|------------------------------------------------------------------------------------------------------------------------------------------------------------------------------------------------------------------------------------|----------------------------------|
| Abel 2011 <sup>1</sup>         | 59       | 295                       | <i>Waist:</i> ActiGraph 7164, Omron HJ-112, three New Lifestyles NL-1000s, three Walk4Life Pros, three Yamax DigiWalker SW-701s                                                                                                    | 0.98, 1.12, 1.33, 1.57, 1.78 m/s |
| An 2017 <sup>2</sup>           | 35       | 175                       | <i>Wrist:</i> Basis B1 Band, Fitbit Flex, Garmin Vivofit, Jawbone UP24, Misfit Shine, Nike+ FuelBand SE, Polar Loop<br><i>Waist:</i> FitBit Zip, Withings Pulse<br><i>Upper arm:</i> SenseWear Armband Mini                        | 0.89, 1.12, 1.34, 1.56, 1.79 m/s |
| Beets 2005 <sup>3</sup>        | 20       | 100                       | <i>Waist:</i> Two Yamax DigiWalker SW-200, two Yamax DigiWalker SW-701, two Walk4Life 2505, two Sun TrekLINQ                                                                                                                       | 0.67, 0.90, 1.12, 1.33, 1.57 m/s |
| Höchsmann 2018 <sup>4</sup>    | 20       | 80                        | <i>Wrist:</i> Garmin VivoFit 2, ActiGraph GT3X+<br><i>Waist:</i> ActiGraph GT3X+                                                                                                                                                   | 0.44, 0.89, 1.33, 1.67 m/s       |
| Kanoun 2009 <sup>5</sup>       | 42       | 168                       | <i>Thigh:</i> ActivPAL                                                                                                                                                                                                             | 0.45, 0.67, 0.90, 1.33 m/s       |
| Le Masurier 2004 <sup>6</sup>  | 12       | 60                        | <i>Waist:</i> Yamax DigiWalker SW-200, Omron HJ-105, Sportline 330, CSA model 7164                                                                                                                                                 | 0.90, 1.12, 1.33, 1.57, 1.78 m/s |
| Leong 2017 <sup>7</sup>        | 48       | 240                       | <i>Waist:</i> Three Samsung Galaxy S4 GT-I9500 smartphones with either Pacer Works, Runtastic, or Tayutau app<br><i>Upper arm:</i> Three Samsung Galaxy S4 GT-I9500 smartphones with either Pacer Works, Runtastic, or Tayutau app | 0.89, 1.12, 1.34, 1.56, 1.79 m/s |
| Maddocks 2010 <sup>8</sup>     | 40       | 200                       | <i>Waist:</i> Yamax DigiWalker SW-401<br><i>Thigh:</i> ActivPAL<br><i>Ankle:</i> PALlite                                                                                                                                           | 0.60, 0.80, 1.00, 1.20, 1.40 m/s |
| Ryan 2006 <sup>9</sup>         | 20       | 100                       | <i>Thigh:</i> ActivPAL                                                                                                                                                                                                             | 0.90, 1.12, 1.33, 1.56, 1.78 m/s |
| Takacs 2014 <sup>10</sup>      | 30       | 150                       | <i>Waist:</i> Two Fitbit Ones                                                                                                                                                                                                      | 0.90, 1.12, 1.33, 1.54, 1.78 m/s |
| Tudor-Locke 2006 <sup>11</sup> | 9        | 9                         | <i>Waist:</i> Kellogg 's Special K Step Counter, Yamax DigiWalker SW-200                                                                                                                                                           | 1.33 m/s                         |

<sup>†</sup> Person-bouts = (sample size) \* (number of bouts per participant)

## References for Supplemental File 4

1. Abel MG, Peritore N, Shapiro R, Mullineaux DR, Rodriguez K, Hannon JC. A comprehensive evaluation of motion sensor step-counting error. *Appl Physiol Nutr Metab.* 2011;36(1):166-170.
2. An HS, Jones GC, Kang SK, Welk GJ, Lee JM. How valid are wearable physical activity trackers for measuring steps? *Eur J Sport Sci.* 2017;17(3):360-368.
3. Beets MW, Patton MM, Edwards S. The accuracy of pedometer steps and time during walking in children. *Med Sci Sports Exerc.* 2005;37(3):513-520.
4. Höchsmann C, Knaier R, Eymann J, Hintermann J, Infanger D, Schmidt-Trucksass A. Validity of activity trackers, smartphones, and phone applications to measure steps in various walking conditions. *Scand J Med Sci Sports.* 2018;28(7):1818-1827.
5. Kanoun N. Validation of the ActivPAL Activity Monitor as a Measure of Walking at Pre-determined Slow Walking Speeds in a Healthy Population in a Controlled Setting. *Reinvention: an International Journal of Undergraduate Research.* 2009;2(2).
6. Le Masurier GC, Lee SM, Tudor-Locke C. Motion sensor accuracy under controlled and free-living conditions. *Med Sci Sports Exerc.* 2004;36(5):905-910.
7. Leong JY, Wong JE. Accuracy of three Android-based pedometer applications in laboratory and free-living settings. *J Sports Sci.* 2017;35(1):14-21.
8. Maddocks M, Petrou A, Skipper L, Wilcock A. Validity of three accelerometers during treadmill walking and motor vehicle travel. *Br J Sports Med.* 2010;44(8):606-608.
9. Ryan CG, Grant PM, Tigbe WW, Granat MH. The validity and reliability of a novel activity monitor as a measure of walking. *Br J Sports Med.* 2006;40(9):779-784.

10. Takacs J, Pollock CL, Guenther JR, Bahar M, Napier C, Hunt MA. Validation of the Fitbit One activity monitor device during treadmill walking. *J Sci Med Sport*. 2014;17(5):496-500.
11. Tudor-Locke C, Sisson SB, Lee SM, Craig CL, Plotnikoff RC, Bauman A. Evaluation of quality of commercial pedometers. *Can J Public Health*. 2006;97 Suppl 1:S10-15, S10-16.
