# Supplementary material
Source: PubMed Central journal article supplement (PMC7855895)
Supplement: NIHMS1647512-supplement-Supplementary_Material_5.pdf [file NIHMS1647512-supplement-Supplementary_Material_5.pdf]

**Supplementary Material 5:** Synthesis of mean absolute percent error (MAPE) and mean percent error (MPE) values for waist-worn step counting devices stratified by internal mechanism (piezoelectric versus spring-levered).

**5.1) Summary of MAPE and MPE values reported for waist-worn step counting devices in treadmill-based validation studies by device mechanism.**

| Error Measure & Mechanism            | Value                      | 0.45 m/s<br>(1.0mph) | 0.67 m/s<br>(1.5 mph) | 0.89 m/s<br>(2.0 mph) | 1.12 m/s<br>(2.5 mph) | 1.34 m/s<br>(3.0 mph) | 1.56 m/s<br>(3.5 mph) | 1.79 m/s<br>(4.0 mph) | 2.01 m/s<br>(4.5 mph) |
|--------------------------------------|----------------------------|----------------------|-----------------------|-----------------------|-----------------------|-----------------------|-----------------------|-----------------------|-----------------------|
| <b>MAPE</b><br><i>Piezo-electric</i> | <b>M</b>                   | 81.7*                | --                    | 3.8                   | 1.2                   | 0.5                   | 0.5                   | 0.6                   | --                    |
|                                      | <b>Q1;Q3</b>               |                      |                       | 1.7 ; 6.9             | 0.6 ; 2.1             | 0.4 ; 1.1             | 0.4 ; 0.5             | 0.3 ; 0.9             |                       |
|                                      | <b>Sample</b> <sup>†</sup> | 20 [1]               | 0                     | 191 [11]              | 171 [10]              | 191 [11]              | 191 [11]              | 171 [10]              | 0                     |
|                                      | <b>M</b>                   | --                   | 35                    | 16.4                  | 6.5                   | 2.4                   | 1.3                   | 0.6                   | --                    |
| <i>Spring-Lever</i>                  | <b>Q1;Q3</b>               |                      | 27.5 ; 39.5           | 10.3 ; 19.2           | 4.0 ; 10.0            | 1.0 ; 3.1             | 1 ; 1.7               | 0.5 ; 0.8             |                       |
|                                      | <b>Sample</b> <sup>†</sup> | 0                    | 60 [9]                | 131 [19]              | 131 [18]              | 140 [20]              | 91 [17]               | 71 [9]                | 0                     |
|                                      | <b>M</b>                   | -96.0                | -39.3                 | -4.8                  | -4.1                  | -1.2                  | -0.8                  | -1.1                  | -0.2                  |
|                                      | <b>Q1;Q3</b>               | -96.0 ; -34.3        | -58.3 ; -19           | -22.2 ; -1.8          | -5.6 ; -0.7           | -2.5 ; 0              | -1.9 ; 0.0            | -3.7 ; -0.1           | -0.2 ; -0.2           |
| <b>MPE</b><br><i>Piezo-electric</i>  | <b>Sample</b> <sup>†</sup> | 14 [4]               | 109 [5]               | 144 [13]              | 201 [6]               | 219 [14]              | 244 [8]               | 94 [8]                | 43 [2]                |
|                                      | <b>M</b>                   | -87.1                | -20.1*                | -15.5                 | -5.1                  | -0.4                  | 0.6                   | -2.7                  | 0.2                   |
|                                      | <b>Q1;Q3</b>               | -87.1 ; -66.8        |                       | -23.7 ; -7.8          | -5.2 ; -3.5           | -1.3 ; -0.1           | -0.7 ; 0.8            | -9.8 ; -1.3           | 0.2 ; 0.3             |
|                                      | <b>Sample</b> <sup>†</sup> | 14 [2]               | 85 [1]                | 124 [7]               | 177 [2]               | 181 [6]               | 220 [4]               | 67 [4]                | 43 [2]                |

Abbreviations: MAPE = mean absolute percent error, MPE = mean percent error, M = median, Q1 = first quartile, Q3 = third quartile  
 Values of M, Q1, and Q3 are weighted by study sample size and their units are percent (%)

<sup>†</sup> Sample presented as: # person-bouts [# reported values]. Person-bouts represent (sample size)\*(bouts per participant testing a device at respective speed and wear location) summed across all studies. Reported values represent total numbers of MAPE or MPE values aggregated from individual studies for a device at respective speed and wear location

\* For speed-wear location combinations with only one reported value, only that value is presented

5.2) Tukey boxplots of MAPE and MPE values reported for waist-worn step counting devices in treadmill-based validation studies by device mechanism.

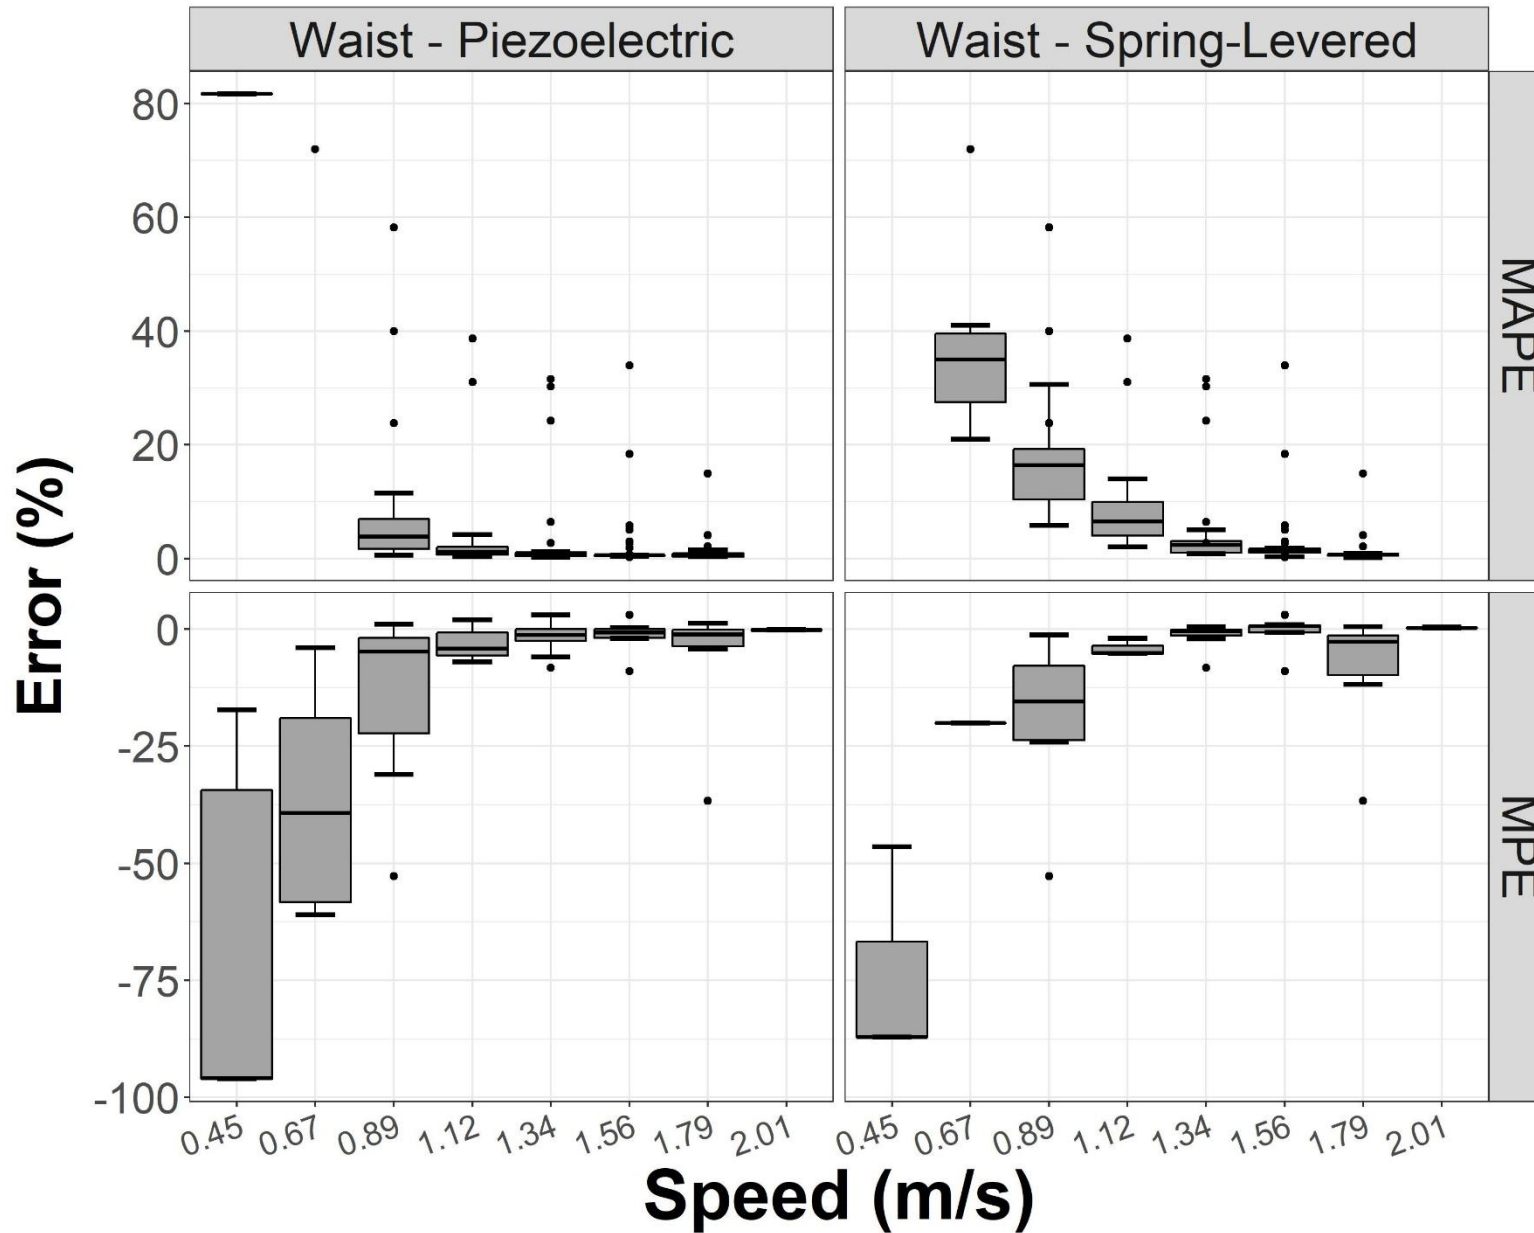

### 5.3) Table of waist-worn step counting devices for which MAPE and/or MPE values were reported, categorized by internal mechanism.

| Device                                                    | Studies in Which Device was Tested                               |
|-----------------------------------------------------------|------------------------------------------------------------------|
| <b>Mechanism: Micro-Electromechanical Systems (MEMS)*</b> |                                                                  |
| Samsung Galaxy S4 GT-I9500                                | Leong 2017                                                       |
| <b>Mechanism: Piezoelectric</b>                           |                                                                  |
| Actical                                                   | Johnson 2015, Oliver 2011                                        |
| ActiGraph 7164                                            | Abel 2011, Le Masurier 2004                                      |
| ActiGraph GT1M                                            | Feito 2015, Brown 2013                                           |
| ActiGraph GT1M (LFE)                                      | Feito 2015                                                       |
| ActiGraph GT3X                                            | Chow 2017, Feito 2015                                            |
| ActiGraph GT3X (LFE)                                      | Feito 2015                                                       |
| ActiGraph GT3X+                                           | Hochsmann 2018                                                   |
| ActiPed                                                   | Brown 2013                                                       |
| activPAL                                                  | Kanoun 2009, Lutzner 2014, Oliver 2011, Ryan 2006, Maddocks 2010 |
| Basis B1 Band                                             | An 2017                                                          |
| Fitbit Charge                                             | Chow 2017                                                        |
| Fitbit Charge HR                                          | Tam and Cheung 2018                                              |
| Fitbit Flex                                               | Diaz 2016, Huang 2016, Chow 2017, An 2017                        |
| Fitbit One                                                | Diaz 2016, Huang 2016, Chow 2017, Takacs 2014                    |
| Fitbit Zip                                                | Beevi 2016, Huang 2016, An HS 2017                               |
| Garmin Vivofit                                            | Huang 2016, An 2017                                              |
| Garmin Vivofit 2                                          | Hochsmann 2018                                                   |
| Jawbone UP24                                              | Huang 2016, Chow 2017, An 2017                                   |
| Mi Band 2                                                 | Tam and Cheung 2018                                              |
| Misfit Shine                                              | An 2017                                                          |
| New Lifestyles NL-1000                                    | Abel 2011                                                        |
| New Lifestyles NL-2000                                    | Duncan 2007                                                      |
| Nike+ Fuelband                                            | Huang 2016                                                       |
| Nike+ FuelBand SE                                         | An 2017                                                          |
| Omron HJ-112                                              | Johnson 2015, Hasson 2009, Abel 2011                             |
| Omron HJ-321                                              | Huang 2016                                                       |
| Omron HJ-720                                              | Beevi 2016                                                       |
| PALlite                                                   | Maddocks 2010                                                    |
| Polar Loop                                                | An 2017                                                          |
| SenseWear Armband Mini                                    | An 2017                                                          |
| StepWatch 3                                               | Feito 2015                                                       |
| Withings Pulse                                            | An 2017                                                          |
| <b>Mechanism: Spring-Levered</b>                          |                                                                  |
| Kellogg Special K step counter                            | Tudor-Locke 2006                                                 |
| Omron HJ-105                                              | Le Masurier 2004                                                 |
| SportBrain iStep X1                                       | Dueker 2012                                                      |
| Sportline 330                                             | Le Masurier 2004                                                 |
| Sun TrekLINQ                                              | Beets 2005                                                       |
| Walk4Life 2505                                            | Beets 2005                                                       |
| Walk4Life Elite                                           | Johnson 2015                                                     |
| Walk4Life Pro                                             | Abel 2011                                                        |
| Yamax Digiwalker CW-700                                   | Oliver 2011                                                      |
| Yamax Digiwalker CW-701                                   | Huang 2016                                                       |

|                         |                                                                                       |
|-------------------------|---------------------------------------------------------------------------------------|
| Yamax Digiwalker SW-200 | Beevi 2016, Duncan 2007, Johnson 2015, Beets 2005, Le Masurier 2004, Tudor-Locke 2006 |
| Yamax Digiwalker SW-401 | Brown 2013, Maddocks 2010                                                             |
| Yamax Digiwalker SW-701 | Dueker 2012, Hasson 2009, Beets 2005, Abel 2011                                       |

---

\*Error values for MEMs devices (i.e., the Samsung Galaxy S4) are not included in the summary table or boxplots above

## References for Supplemental File 5

1. Abel MG, Peritore N, Shapiro R, Mullineaux DR, Rodriguez K, Hannon JC. A comprehensive evaluation of motion sensor step-counting error. *Appl Physiol Nutr Metab.* 2011;36(1):166-170.
2. An HS, Jones GC, Kang SK, Welk GJ, Lee JM. How valid are wearable physical activity trackers for measuring steps? *Eur J Sport Sci.* 2017;17(3):360-368.
3. Beets MW, Patton MM, Edwards S. The accuracy of pedometer steps and time during walking in children. *Med Sci Sports Exerc.* 2005;37(3):513-520.
4. Höchsmann C, Knaier R, Eymann J, Hintermann J, Infanger D, Schmidt-Trucksass A. Validity of activity trackers, smartphones, and phone applications to measure steps in various walking conditions. *Scand J Med Sci Sports.* 2018;28(7):1818-1827.
5. Kanoun N. Validation of the ActivPAL Activity Monitor as a Measure of Walking at Pre-determined Slow Walking Speeds in a Healthy Population in a Controlled Setting. *Reinvention: an International Journal of Undergraduate Research.* 2009;2(2).
6. Le Masurier GC, Lee SM, Tudor-Locke C. Motion sensor accuracy under controlled and free-living conditions. *Med Sci Sports Exerc.* 2004;36(5):905-910.
7. Leong JY, Wong JE. Accuracy of three Android-based pedometer applications in laboratory and free-living settings. *J Sports Sci.* 2017;35(1):14-21.
8. Maddocks M, Petrou A, Skipper L, Wilcock A. Validity of three accelerometers during treadmill walking and motor vehicle travel. *Br J Sports Med.* 2010;44(8):606-608.
9. Ryan CG, Grant PM, Tigbe WW, Granat MH. The validity and reliability of a novel activity monitor as a measure of walking. *Br J Sports Med.* 2006;40(9):779-784.

10. Takacs J, Pollock CL, Guenther JR, Bahar M, Napier C, Hunt MA. Validation of the Fitbit One activity monitor device during treadmill walking. *J Sci Med Sport*. 2014;17(5):496-500.
11. Tudor-Locke C, Sisson SB, Lee SM, Craig CL, Plotnikoff RC, Bauman A. Evaluation of quality of commercial pedometers. *Can J Public Health*. 2006;97 Suppl 1:S10-15, S10-16.
12. Beevi FH, Miranda J, Pedersen CF, Wagner S. An Evaluation of Commercial Pedometers for Monitoring Slow Walking Speed Populations. *Telemed J E Health*. 2016;22(5):441-449.
13. Brown DK, Grimwade D, Martinez-Bussion D, Taylor MJ, Gladwell VF. The validity of the ActiPed for physical activity monitoring. *Int J Sports Med*. 2013;34(5):431-437.
14. Chow JJ, Thom JM, Wewege MA, Ward RE, Parmenter BJ. Accuracy of step count measured by physical activity monitors: The effect of gait speed and anatomical placement site. *Gait Posture*. 2017;57:199-203.
15. Diaz KM, Krupka DJ, Chang MJ, et al. Validation of the Fitbit One(R) for physical activity measurement at an upper torso attachment site. *BMC Res Notes*. 2016;9:213.
16. Dueker D, Gauderman WJ, McConnell R. Accuracy of a new time-resolved step counter in children. *Pediatr Exerc Sci*. 2012;24(4):622-633.
17. Duncan JS, Schofield G, Duncan EK, Hinckson EA. Effects of age, walking speed, and body composition on pedometer accuracy in children. *Res Q Exerc Sport*. 2007;78(5):420-428.
18. Feito Y, Garner HR, Bassett DR. Evaluation of ActiGraph's low-frequency filter in laboratory and free-living environments. *Med Sci Sports Exerc*. 2015;47(1):211-217.
19. Hasson RE, Haller J, Poher DM, Staudenmayer J, Freedson PS. Validity of the Omron HJ-112 pedometer during treadmill walking. *Med Sci Sports Exerc*. 2009;41(4):805-809.
20. Huang Y, Xu J, Yu B, Shull PB. Validity of FitBit, Jawbone UP, Nike+ and other wearable devices for level and stair walking. *Gait Posture*. 2016;48:36-41.

21. Johnson M, Meltz K, Hart K, Schmudlach M, Clarkson L, Borman K. Validity of the Actical activity monitor for assessing steps and energy expenditure during walking. *J Sports Sci.* 2015;33(8):769-776.
22. Lutzner C, Voigt H, Roeder I, Kirschner S, Lutzner J. Placement makes a difference: accuracy of an accelerometer in measuring step number and stair climbing. *Gait Posture.* 2014;39(4):1126-1132.
23. Oliver M, Badland H, Shepherd J, Schofield GM. Counting steps in research: A comparison of accelerometry and pedometry. *Open J Prev Med.* 2011;1(1):1-7.
24. Park W, Lee VJ, Ku B, Tanaka H. Effect of walking speed and placement position interactions in determining the accuracy of various newer pedometers. *J Exerc Sci Fit.* 2014;12(1):31-37.
25. Tam KM, Cheung SY. Validation of Electronic Activity Monitor Devices During Treadmill Walking. *Telemed J E Health.* 2018;24(10):782-789.
