# Supplementary material
Source: PubMed Central journal article supplement (PMC7855895)
Supplement: NIHMS1647512-supplement-Supplementary_Material_6.pdf [file NIHMS1647512-supplement-Supplementary_Material_6.pdf]

**Supplementary Material 6:** Synthesis of mean percentage error (MPE) values reported by treadmill-based validation studies of step counting devices.

**6.1) Search strategy and article screening flowchart**

| <b>Item</b>           | <b>Criteria</b>                                                                                                                               |
|-----------------------|-----------------------------------------------------------------------------------------------------------------------------------------------|
| Databases             | PubMed and SPORTDiscus                                                                                                                        |
| Dates                 | Updated until August 2019; no limit on publication date                                                                                       |
| Boolean search string | 1. (acceleromet* OR pedomet* OR device OR monitor OR wearable) AND ("steps/min*" OR "steps per min*" OR "step count") AND (valid* OR reliab*) |
| Filters               | Human; English                                                                                                                                |

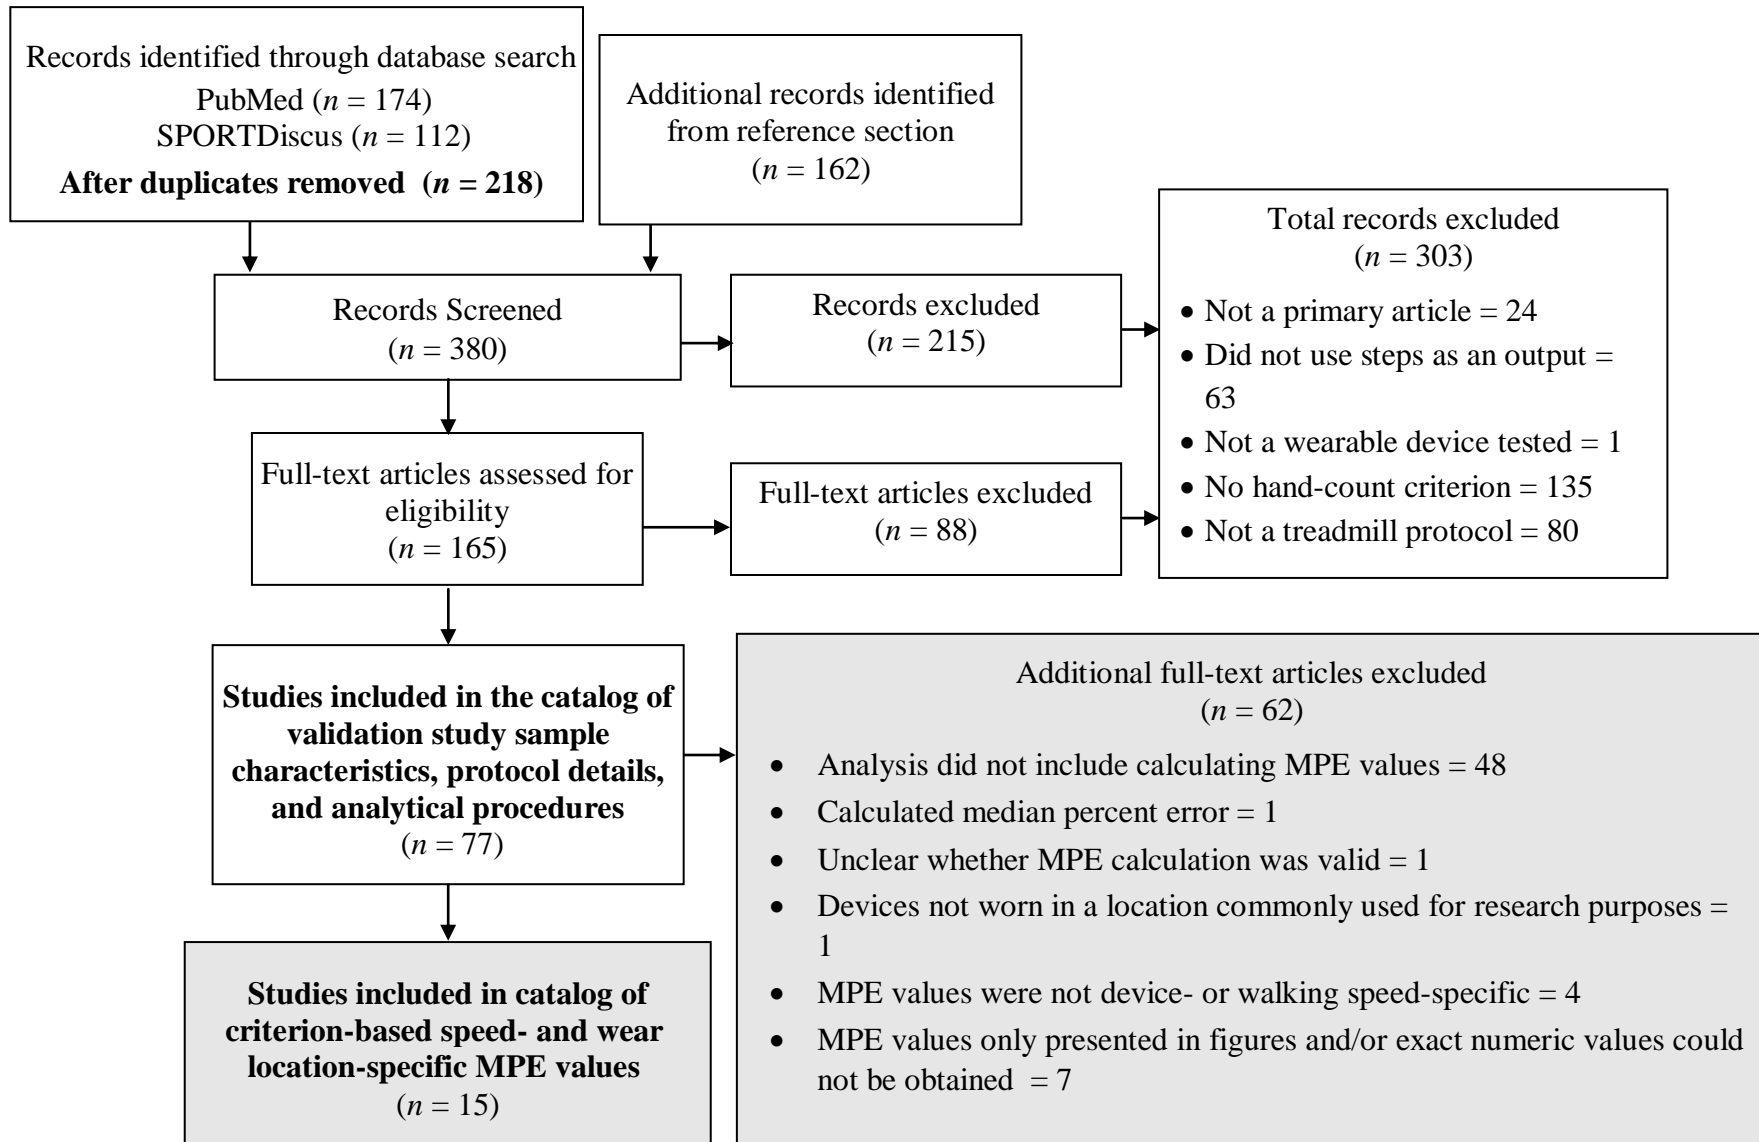

### 6.2) Equation for MPE calculations

$$MPE = \left( \frac{1}{n} \sum \frac{Device - Criterion}{Criterion} \right) * 100\%$$

Where *criterion* is the hand-counted steps from direct observation, *device* is the step count output from the device being tested, and *n* is the total number of step count observations (i.e., person-bouts) being analyzed

### 6.3) Tukey boxplots of MPE values reported by treadmill-based validation studies of step counting device, with quantiles weighted by sample size

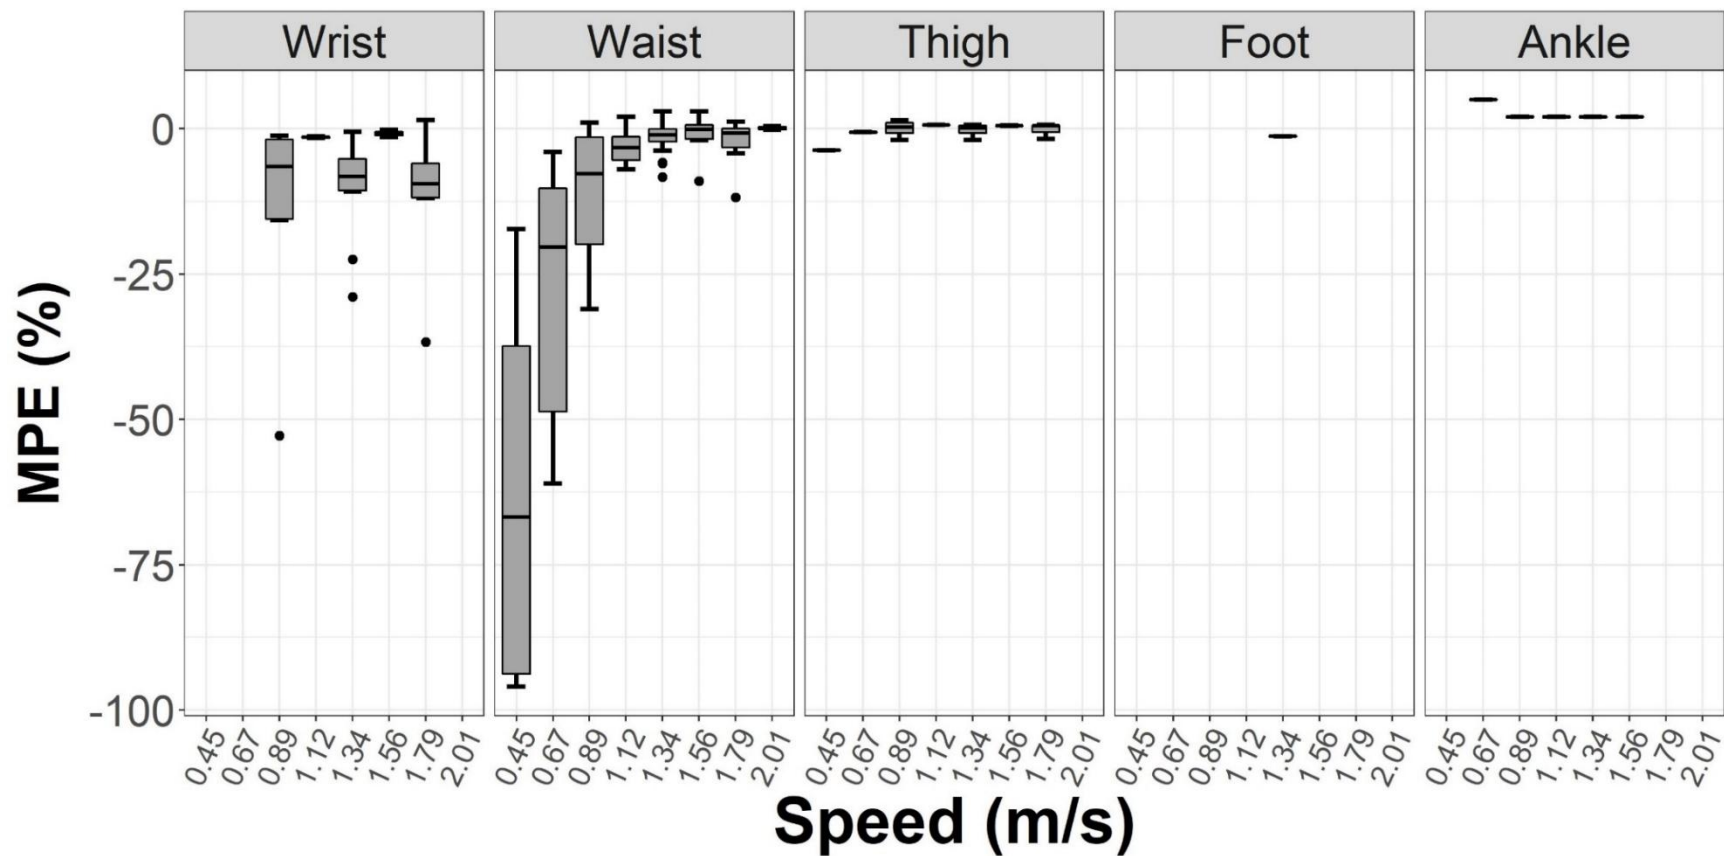

#### 6.4) Summary of MPE values reported by treadmill-based validation studies of step

| Wear Location | Value*  | 0.45 m/s<br>(1.0mph) | 0.67 m/s<br>(1.5 mph) | 0.89 m/s<br>(2.0 mph) | 1.12 m/s<br>(2.5 mph) | 1.34 m/s<br>(3.0 mph) | 1.56 m/s<br>(3.5 mph) | 1.79 m/s<br>(4.0 mph) | 2.01 m/s<br>(4.5 mph) |
|---------------|---------|----------------------|-----------------------|-----------------------|-----------------------|-----------------------|-----------------------|-----------------------|-----------------------|
| <i>Wrist</i>  | M       | --                   | --                    | -10.1                 | -1.6                  | -8.4                  | -1.5                  | -9.6                  | --                    |
|               | Q1;Q3   | --                   | --                    | -15.7;-2.2            | -1.6;-1.5             | -19.4;-5.4            | -1.5;-0.8             | -12;-6.6              | --                    |
|               | Sample† | 0                    | 0                     | 83 [7]                | 30 [2]                | 114 [10]              | 30 [2]                | 114 [10]              | 0                     |
| <i>Waist</i>  | M       | -87.1                | -20.6                 | -7.9                  | -3.8                  | -0.7                  | -0.3                  | -1.0                  | -0.1                  |
|               | Q1;Q3   | -96.0;-40.4          | -49.9;-20.2           | -21.9;-2.4            | -5.4;-1.9             | -1.9;0                | -1.2;0.6              | -3.6;-0.2             | -0.2;0.2              |
|               | Sample† | 14 [6]               | 109 [6]               | 161 [20]              | 201 [8]               | 258 [20]              | 244 [12]              | 111 [12]              | 43 [4]                |
| <i>Thigh</i>  | M       | -3.7*                | -0.6*                 | 0.0                   | 0.6                   | -0.1                  | 0.5                   | -0.4                  | --                    |
|               | Q1;Q3   | --                   | --                    | -1.2;1.1              | 0.6;0.6               | -1.2;0.5              | 0.4;0.5               | -1.4;0.5              | --                    |
|               | Sample† | 42 [1]               | 42 [1]                | 115 [4]               | 63 [2]                | 115 [4]               | 63 [2]                | 73 [3]                | 0                     |
| <i>Foot</i>   | M       | --                   | --                    | --                    | --                    | -1.3*                 | --                    | --                    | --                    |
|               | Q1;Q3   | --                   | --                    | --                    | --                    | --                    | --                    | --                    | --                    |
|               | Sample† | 0                    | 0                     | 0                     | 0                     | 22 [1]                | 0                     | 0                     | 0                     |
| <i>Ankle</i>  | M       | --                   | 5.0*                  | 2.0*                  | 2.0*                  | 2.0*                  | 2.0*                  | --                    | --                    |
|               | Q1;Q3   | --                   | --                    | --                    | --                    | --                    | --                    | --                    | --                    |
|               | Sample† | 0                    | 24 [1]                | 24 [1]                | 24 [1]                | 24 [1]                | 24 [1]                | 0                     | 0                     |

Abbreviations: M = median, Q1 = first quartile, Q3 = third quartile

Values of M, Q1, and Q3 are weighted by study sample size and their units are percent (%)

† Presented as: # person-bouts [# reported values]. Person-bouts represent (sample size)\*(bouts per participant testing a device at respective speed and wear location) summed across all studies. Reported values represent total numbers of MAPE values aggregated from individual studies for a device at respective speed and wear location

\* For speed-wear location combinations with only one reported value, only that value is presented  
**counting devices.**

**6.5) Summary of MPE values reported by treadmill-based validation studies of step counting devices by device make/model.**

| <b>Device Make/Model</b>   | <b>0.45 m/s<br/>(1.0 mph)</b> | <b>0.67 m/s<br/>(1.5 mph)</b> | <b>0.89 m/s<br/>(2.0 mph)</b> | <b>1.12 m/s<br/>(2.5 mph)</b> | <b>1.34 m/s<br/>(3.0 mph)</b> | <b>1.56 m/s<br/>(3.5 mph)</b> | <b>1.79 m/s<br/>(4.0 mph)</b> | <b>2.01 m/s<br/>(4.5 mph)</b> |
|----------------------------|-------------------------------|-------------------------------|-------------------------------|-------------------------------|-------------------------------|-------------------------------|-------------------------------|-------------------------------|
| <b>Wrist-Worn Devices:</b> |                               |                               |                               |                               |                               |                               |                               |                               |
| ActiGraph GT3X             | --                            | --                            | --                            | --                            | -28.9*                        | --                            | -36.7*                        | --                            |
| Fitbit Charge              | --                            | --                            | --                            | --                            | -7.9*                         | --                            | -10.1*                        | --                            |
| Fitbit Charge HR           | --                            | --                            | -1.4*                         | -1.6*                         | -0.6*                         | -1.5*                         | -1.5*                         | --                            |
| Fitbit Flex                | --                            | --                            | -8.8 [6.6]                    | --                            | -7.2 [2.6]                    | --                            | -10.5 [1.9]                   | --                            |
| Garmin Vivofit             | --                            | --                            | -2.3*                         | --                            | -5.6*                         | --                            | -5.4*                         | --                            |
| Jawbone UP 24              | --                            | --                            | -15.3*                        | --                            | -10.8*                        | --                            | -7.6*                         | --                            |
| Mi Band 2                  | --                            | --                            | -1.2*                         | -1.3*                         | -0.9*                         | -0.2*                         | 1.5*                          | --                            |
| Nike+ Fuelband             | --                            | --                            | -52.8*                        | --                            | -22.5*                        | --                            | -12*                          | --                            |
| <b>Waist-Worn Devices:</b> |                               |                               |                               |                               |                               |                               |                               |                               |
| Actical                    | --                            | --                            | -20.8 [3.1]                   | --                            | -3.8*                         | -1.7*                         | -1*                           | -0.1*                         |
| ActiGraph GT1M             | --                            | -61*                          | -31*                          | -7*                           | -4.8 [3.1]                    | -9*                           | --                            | --                            |
| ActiGraph GT1M (LFE)       | --                            | -7*                           | -1*                           | -2*                           | -2*                           | -2*                           | --                            | --                            |
| ActiGraph GT3X             | --                            | -58*                          | -31*                          | -6*                           | -0.5 [0.6]                    | -2*                           | 0.9*                          | --                            |
| ActiGraph GT3X (LFE)       | --                            | -4*                           | 1*                            | 2*                            | 3*                            | 3*                            | --                            | --                            |
| Fitbit One                 | --                            | --                            | -3.2 [1.6]                    | --                            | -0.6 [0.9]                    | --                            | -0.3 [1.6]                    | --                            |
| Fitbit Zip                 | -56.6 [55.7]                  | --                            | -1.8 [2.4]                    | --                            | -5.8*                         | --                            | -3.4*                         | --                            |
| Jawbone                    | --                            | --                            | --                            | --                            | -2.6*                         | --                            | -4.3*                         | --                            |
| New Lifestyles NL-2000     | --                            | -20.6*                        | --                            | -4.5*                         | --                            | -0.5*                         | --                            | --                            |
| Omron HJ-112               | --                            | --                            | -1.9*                         | 0.5*                          | 0.2*                          | 0.2 [0.1]                     | --                            | -0.2*                         |
| Omron HJ-321               | --                            | --                            | -13.1*                        | --                            | -1.4*                         | --                            | -0.2*                         | --                            |
| Omron HJ-720               | -65.1 [43.6]                  | --                            | 0.6*                          | --                            | --                            | --                            | --                            | --                            |
| SportBrain iStep XL        | --                            | --                            | -1.3*                         | --                            | -0.5*                         | --                            | -3.2*                         | --                            |
| Walk4Life Elite            | --                            | --                            | -7.6*                         | --                            | --                            | 0.7*                          | --                            | 0.4*                          |
| Yamax Digiwalker CW-700    | --                            | --                            | -17.4*                        | --                            | -2.1*                         | --                            | 0.5*                          | --                            |
| Yamax Digiwalker CW-701    | --                            | --                            | -7.9*                         | --                            | -0.7*                         | --                            | -0.6*                         | --                            |
| Yamax Digiwalker SW-200    | -66.8 [28.7]                  | -20.1*                        | -23.7 [1.2]                   | -5.2*                         | --                            | -0.3 [0.9]                    | --                            | 0.2*                          |
| Yamax Digiwalker SW-401    | --                            | --                            | --                            | --                            | 0.5*                          | --                            | --                            | --                            |
| Yamax Digiwalker SW-701    | --                            | --                            | -19.3*                        | -2*                           | -1.3 [5.9]                    | 0.9*                          | -11.8*                        | --                            |
| <b>Thigh-Worn Devices:</b> |                               |                               |                               |                               |                               |                               |                               |                               |
| activPAL                   | -3.7*                         | -0.6*                         | 0.4 [1.3]                     | 0.6 [0]                       | 0 [0.9]                       | 0.5 [0.1]                     | 0.2 [1.1]                     | --                            |
| <b>Foot-Worn Devices:</b>  |                               |                               |                               |                               |                               |                               |                               |                               |
| ActiPed                    | --                            | --                            | --                            | --                            | -1.3*                         | --                            | --                            | --                            |
| <b>Ankle-Worn Devices:</b> |                               |                               |                               |                               |                               |                               |                               |                               |
| StepWatch 3                | --                            | 5*                            | 2*                            | 2*                            | 2*                            | 2*                            | --                            | --                            |

All values are presented as: mean [SD]% and weighted by sample size

\* Only one reported value (i.e., device tested in only one study at respective speed)

**6.6) Descriptions of treadmill-based validation studies from which speed- and wear location-specific MPE values were obtained.**

| Study                      | <i>n</i> | Person-bouts <sup>†</sup> | Device Makes/Models Tested by Wear Location                                                                                                             | Walking Speeds                  |
|----------------------------|----------|---------------------------|---------------------------------------------------------------------------------------------------------------------------------------------------------|---------------------------------|
| Beevi 2016 <sup>1</sup>    | 14       | 42                        | <i>Waist:</i> Fitbit Zip, Omron HJ-720, Yamax Digiwalker SW-200                                                                                         | 0.28, 0.56, 0.83 m/s            |
| Brown 2013 <sup>2</sup>    | 22       | 22                        | <i>Waist:</i> ActiGraph GT1M, Yamax Digiwalker SW-401<br><i>Foot:</i> ActiPed                                                                           | 1.33 m/s                        |
| Chow 2017 <sup>3</sup>     | 31       | 62                        | <i>Wrist:</i> ActiGraph GT3X, Fitbit Charge, Fitbit Flex<br><i>Waist:</i> ActiGraph GT3X, Fitbit One, Jawbone                                           | 1.39, 1.81 m/s                  |
| Diaz 2016 <sup>4</sup>     | 13       | 39                        | <i>Wrist:</i> Fitbit Flex<br><i>Waist:</i> Fitbit One                                                                                                   | 0.85, 1.34, 1.79 m/s            |
| Dueker 2012 <sup>5</sup>   | 17       | 51                        | <i>Waist:</i> SportBrain iStep X1, Yamax Digiwalker SW-701                                                                                              | 0.89, 1.34, 1.79 m/s            |
| Duncan 2007 <sup>6</sup>   | 85       | 255                       | <i>Waist:</i> New Lifestyles NL-2000, Yamax Digiwalker SW-200                                                                                           | 0.7, 1.1, 1.5 m/s               |
| Feito 2015 <sup>7</sup>    | 24       | 120                       | <i>Waist:</i> ActiGraph GT1M, ActiGraph GT1M (LFE), ActiGraph GT3X, ActiGraph GT3X (LFE)<br><i>Ankle:</i> StepWatch 3                                   | 0.67, 0.9, 1.12, 1.33, 1.57 m/s |
| Hasson 2009 <sup>8</sup>   | 92       | 276                       | <i>Waist:</i> Omron HJ-112, Yamax Digiwalker SW-701                                                                                                     | 1.12, 1.34, 1.56 m/s            |
| Huang 2016 <sup>9</sup>    | 40       | 120                       | <i>Wrist:</i> Fitbit Flex, Garmin Vivofit, Jawbone UP 24, Nike+ Fuelband<br><i>Waist:</i> Fitbit One, Fitbit Zip, Omron HJ-321, Yamax Digiwalker CW-701 | 0.9, 1.33, 1.78 m/s             |
| Johnson 2015 <sup>10</sup> | 43       | 129                       | <i>Waist:</i> Actical, Omron HJ-112, Walk4Life Elite, Yamax Digiwalker SW-200                                                                           | 0.89, 1.56, 2.01 m/s            |
| Kanoun 2009 <sup>11</sup>  | 42       | 168                       | <i>Thigh:</i> ActivPAL                                                                                                                                  | 0.45, 0.67, 0.9, 1.33 m/s       |
| Lutzner 2014 <sup>12</sup> | 43       | 215                       | <i>Thigh:</i> ActivPAL                                                                                                                                  | 0.9, 1.1, 1.3, 1.6, 1.8 m/s     |
| Oliver 2011 <sup>13</sup>  | 10       | 30                        | <i>Waist:</i> Actical, Yamax Digiwalker CW-700<br><i>Thigh:</i> ActivPAL                                                                                | 0.9, 1.33, 1.78 m/s             |
| Ryan 2006 <sup>14</sup>    | 20       | 100                       | <i>Thigh:</i> ActivPAL                                                                                                                                  | 0.9, 1.12, 1.33, 1.56, 1.78 m/s |
| Tam 2018 <sup>15</sup>     | 30       | 150                       | <i>Wrist:</i> Fitbit Charge HR, Mi Band 2                                                                                                               | 0.9, 1.12, 1.33, 1.54, 1.78 m/s |

<sup>†</sup> Person-bouts = (sample size) \* (number of bouts per participant)

## References for Supplemental File 6

1. Beevi FH, Miranda J, Pedersen CF, Wagner S. An Evaluation of Commercial Pedometers for Monitoring Slow Walking Speed Populations. *Telemed J E Health*. 2016;22(5):441-449.
2. Brown DK, Grimwade D, Martinez-Bussion D, Taylor MJ, Gladwell VF. The validity of the ActiPed for physical activity monitoring. *Int J Sports Med*. 2013;34(5):431-437.
3. Chow JJ, Thom JM, Wewege MA, Ward RE, Parmenter BJ. Accuracy of step count measured by physical activity monitors: The effect of gait speed and anatomical placement site. *Gait Posture*. 2017;57:199-203.
4. Diaz KM, Krupka DJ, Chang MJ, et al. Validation of the Fitbit One(R) for physical activity measurement at an upper torso attachment site. *BMC Res Notes*. 2016;9:213.
5. Dueker D, Gauderman WJ, McConnell R. Accuracy of a new time-resolved step counter in children. *Pediatr Exerc Sci*. 2012;24(4):622-633.
6. Duncan JS, Schofield G, Duncan EK, Hinckson EA. Effects of age, walking speed, and body composition on pedometer accuracy in children. *Res Q Exerc Sport*. 2007;78(5):420-428.
7. Feito Y, Garner HR, Bassett DR. Evaluation of ActiGraph's low-frequency filter in laboratory and free-living environments. *Med Sci Sports Exerc*. 2015;47(1):211-217.
8. Hasson RE, Haller J, Pober DM, Staudenmayer J, Freedson PS. Validity of the Omron HJ-112 pedometer during treadmill walking. *Med Sci Sports Exerc*. 2009;41(4):805-809.
9. Huang Y, Xu J, Yu B, Shull PB. Validity of FitBit, Jawbone UP, Nike+ and other wearable devices for level and stair walking. *Gait Posture*. 2016;48:36-41.
10. Johnson M, Meltz K, Hart K, Schmudlach M, Clarkson L, Borman K. Validity of the Actical activity monitor for assessing steps and energy expenditure during walking. *J Sports Sci*. 2015;33(8):769-776.

11. Kanoun N. Validation of the ActivPAL Activity Monitor as a Measure of Walking at Pre-determined Slow Walking Speeds in a Healthy Population in a Controlled Setting. *Reinvention: an International Journal of Undergraduate Research*. 2009;2(2).
12. Lutzner C, Voigt H, Roeder I, Kirschner S, Lutzner J. Placement makes a difference: accuracy of an accelerometer in measuring step number and stair climbing. *Gait Posture*. 2014;39(4):1126-1132.
13. Oliver M, Badland H, Shepherd J, Schofield GM. Counting steps in research: A comparison of accelerometry and pedometry. *Open J Prev Med*. 2011;1(1):1-7.
14. Ryan CG, Grant PM, Tigbe WW, Granat MH. The validity and reliability of a novel activity monitor as a measure of walking. *Br J Sports Med*. 2006;40(9):779-784.
15. Tam KM, Cheung SY. Validation of Electronic Activity Monitor Devices During Treadmill Walking. *Telemed J E Health*. 2018;24(10):782-789.
